# Supplementary material for: Assessing Obesogenic School Environments in Sibiu County, Romania: Adapting the ISCOLE School Environment Questionnaire
Source: MDPI journal article supplement (doi:10.3390/children10111746), 2023-10-27
Supplement: s1 [file s1]

**Table S1 - Original ISCOLE questions, forward and backward translations or adaptations**

|          | Question, section title or description                                                                                                                                                                                                                          |
|----------|-----------------------------------------------------------------------------------------------------------------------------------------------------------------------------------------------------------------------------------------------------------------|
| Original | <b>ISCOLE SCHOOL ENVIRONMENT QUESTIONNAIRE</b>                                                                                                                                                                                                                  |
| Adapted  | <b>Înfluența mediului școlar asupra obezității la copii</b>                                                                                                                                                                                                     |
| Backward | <b>Influence of the school environment on obesity in children</b>                                                                                                                                                                                               |
| Original | (none)                                                                                                                                                                                                                                                          |
| Adapted  | Vă rugăm să citiți fi ecare întrebare cu atenție.<br>Marcați la fiecare întrebare răspunsul care se potrivește cel mai bine.<br>De ținut minte:<br>- Acesta nu este un test așa că nu există răspunsuri greșite.<br>- Datele obținute au caracter confidențial. |
| Backward | Please read each question carefully.<br>Mark each question with the answer that suits you best. Remember:<br>- This is not a test, so there are no wrong answers.<br>- The data obtained are confidential.                                                      |
| Original | <b>A. SCHOOL CHARACTERISTICS</b>                                                                                                                                                                                                                                |
| Forward  | <b>A. Caracteristicile școlii</b>                                                                                                                                                                                                                               |
| Backward | <b>A. Characteristics of the school</b>                                                                                                                                                                                                                         |
| Original | (none)                                                                                                                                                                                                                                                          |
| Adapted  | 1. Vă rugăm specificați cum se numește școala în care vă desfășurați activitatea profesională.                                                                                                                                                                  |
| Backward | 1. Please specify the name of the school where you work.                                                                                                                                                                                                        |
| Original | <b>1. What is your position at this school?</b> <input type="checkbox"/> Principal <input type="checkbox"/> Vice Principal <input type="checkbox"/> Teacher <input type="checkbox"/> Other: _____                                                               |
| Forward  | 2. Care este funcția dumneavoastră în această școală?<br><i>Director / Director adjunct / Profesor</i>                                                                                                                                                          |
| Backward | 2. What is your position in this school?<br><i>Principal / assistant principal / teacher</i>                                                                                                                                                                    |
| Original | <b>2. What is the total number of students in your school?</b> (Please estimate) _____ students                                                                                                                                                                 |
| Forward  | 3. Care este numărul aproximativ de elevi care învață la școala în care activați?                                                                                                                                                                               |
| Backward | 3. What is the approximate number of students at the school where you work?                                                                                                                                                                                     |
| Original | <b>3. What is the total number of teachers (full time equivalents) in your school?</b> (Please estimate) _____ teachers                                                                                                                                         |
| Forward  | 4. Care este numărul aproximativ de posturi didactice la școala în care activați?                                                                                                                                                                               |
| Backward | 4. What is the approximate number of teachers at the school where you work?                                                                                                                                                                                     |
| Original | <b>4. What grades are taught at your school?</b> _____ to _____                                                                                                                                                                                                 |
| Forward  | 5. Vă rugăm selectați tipul de învățământ oferit de școala la care activați (selectați toate răspunsurile care corespund):<br><i>Învățământ primar - Clasele I-IV / Învățământ gimnazial - Clasele V-VIII / Învățământ liceal - Clasele IX-XIII</i>             |
| Backward | 5. Please select the type of education offered by the school you are attending (select all corresponding answers):<br><i>Primary education-classes I-IV / Secondary Education - Classes V-VIII / High School Education-Classes IX-XIII</i>                      |
| Original | <b>5. How many days (excluding holidays) do your students attend school during the academic school year?</b> _____                                                                                                                                              |
| Adapted  | (removed)                                                                                                                                                                                                                                                       |
| Original | (none)                                                                                                                                                                                                                                                          |
| Adapted  | 6. Școala dumneavoastră alocă dintre orele CDS/CDL (curriculum la decizia școlii/curriculum în dezvoltare locală) ore destinate <b>activității fizice</b> ?<br><i>Da, la toate clasele / Da, dar numai la anumite niveluri/specializări / Nu</i>                |
| Backward | 6. Does your school allocate <b>physical activity</b> hours from CDS/CDL (curriculum at school decision/curriculum in local development)?                                                                                                                       |

|          |                                                                                                                                                                                                                                                                                                                                                                                                                                                                                                                                                                                                 |
|----------|-------------------------------------------------------------------------------------------------------------------------------------------------------------------------------------------------------------------------------------------------------------------------------------------------------------------------------------------------------------------------------------------------------------------------------------------------------------------------------------------------------------------------------------------------------------------------------------------------|
|          | <i>Yes, in all classes / yes, but only at certain levels/majors / No</i>                                                                                                                                                                                                                                                                                                                                                                                                                                                                                                                        |
| Original | <i>(none)</i>                                                                                                                                                                                                                                                                                                                                                                                                                                                                                                                                                                                   |
| Adapted  | 7. Școala dumneavoastră alocă dintre orele CDȘ/CDL (curriculum la decizia școlii/curriculum în dezvoltare locală) ore destinate promovării <b>alimentației sănătoase</b> ?<br><i>Da, la toate clasele / Da, dar numai la anumite niveluri/specializări / Nu</i>                                                                                                                                                                                                                                                                                                                                 |
| Backward | 7. Does your school allocate CDS/CDL classes (curriculum at school decision/curriculum in local development) to promote <b>healthy eating</b> ?<br><i>Yes, in all classes / yes, but only at certain levels/majors / No</i>                                                                                                                                                                                                                                                                                                                                                                     |
| Original | <b>B. POLICIES AND PRACTICES</b>                                                                                                                                                                                                                                                                                                                                                                                                                                                                                                                                                                |
| Forward  | <b>B. Politicile și practicile școlii privind alimentația sănătoasă și activitatea fizică</b>                                                                                                                                                                                                                                                                                                                                                                                                                                                                                                   |
| Backward | <b>B. School policies and practices on healthy eating and physical activity</b>                                                                                                                                                                                                                                                                                                                                                                                                                                                                                                                 |
| Original | For the following section, "policies" refers to any mandates issued by the state, the local school board, or any other agency, including policies developed by your school or (district/diocese), that affects your school environment and that have been <b>officially adopted by your school or district</b> . This section also asks about practices (what your students and staff are allowed to do on a regular basis) that you might follow to promote the health and well-being of students.                                                                                             |
| Forward  | În această secțiune termenul de „politici” se referă la <b>reglementări</b> impuse la nivel de stat (spre exemplu programul „Laptele și cornul”) sau de către conducerea școlii ori alte autorități capabile de a influența mediul din cadrul școlii care au fost adoptate în mod <b>oficial</b> . Termenul de „practici” se referă la activități și inițiative care sunt permise elevilor și profesorilor școlii <b>în afara curiculei sau a orelor de educație fizică</b> pentru promovarea unui stil de viață sănătos sau pentru desfășurarea de evenimente care implică activitatea fizică. |
| Backward | In this section, the term "policies" refers to <b>regulations</b> imposed at state level (for example, the "Milk and Breadstick" program) or by school management or other authorities capable of influencing the school environment that have been formally <b>adopted</b> . The term 'practices' refers to activities and initiatives that are allowed to school students and teachers <b>outside curricula or physical education classes</b> to promote a healthy lifestyle or to conduct events involving physical activity.                                                                |
| Original | <b>6. Does your school have written policies or practices concerning <u>physical activity</u>?</b><br><br><input type="checkbox"/> <b>Yes, existing written policies</b><br><input type="checkbox"/> <b>Yes, written policies still under development</b><br><input type="checkbox"/> <b>Yes, practices</b><br><input type="checkbox"/> <b>No</b><br><input type="checkbox"/> <b>N/A</b>                                                                                                                                                                                                        |
| Forward  | 8. Există în școala dumneavoastră <i>politici</i> sau <i>practici</i> privind <b>activitatea fizică</b> ? De exemplu:<br><br><b>Politică:</b> permiterea accesului la facilitățile școlii în afara programului în vederea activității fizice<br><b>Practici:</b> excursii la munte periodice, drumeții.<br><i>Da, există politici scrise / Da, există politici, dar nu sunt încă scrise / Da, există practici / Nu există politici sau practici</i>                                                                                                                                             |
| Backward | 8. Are there any <i>physical activity policies</i> or <b>practices</b> in your school? For example:<br><br><b>Policies:</b> Policies allowing after-hours access to school facilities for physical activities.                                                                                                                                                                                                                                                                                                                                                                                  |

|          |                                                                                                                                                                                                                                                                                                                                                                                                                                                                                                                                                                                        |
|----------|----------------------------------------------------------------------------------------------------------------------------------------------------------------------------------------------------------------------------------------------------------------------------------------------------------------------------------------------------------------------------------------------------------------------------------------------------------------------------------------------------------------------------------------------------------------------------------------|
|          | <p><b>Practices:</b> periodic mountain trips, hiking trips.</p> <p><i>Yes, there are written policies / Yes, there are policies, but they are not yet written / Yes, there are practices/ No policies or practices</i></p>                                                                                                                                                                                                                                                                                                                                                             |
| Original | (none)                                                                                                                                                                                                                                                                                                                                                                                                                                                                                                                                                                                 |
| Adapted  | <p>9. Dacă ați răspuns DA la întrebarea precedentă, vă rugăm elaborați asupra <i>politicilor</i> și/sau <i>practicilor</i> implementate la nivelul școlii în care activați pentru promovarea activității fizice.</p> <p>Menționați politica sau practica și oferiți o scurtă descriere. De exemplu:</p> <p><b>Politică</b> de promovare a activității fizice prin permiterea accesului la echipament sportiv pe perioada pauzei (ex. mingi de baschet, rachete de tenis etc.)</p> <p><b>Practică</b> de promovare a activității fizice prin organizare anuală a unei cupe de schi.</p> |
| Backward | <p>9. If you answered YES to the previous question, please elaborate on the policies and/or practices implemented at the level of the school you work in for the promotion of physical activity.</p> <p>Mention the policy or practice and provide a brief description. For example:</p> <p><b>Politics</b> to promote daily activity by allowing access to sports equipment during break (ex. basketballs, tennis rackets, etc.)</p> <p><b>Practice</b> to promote physical activity by organizing a yearly ski competition.</p>                                                      |
| Original | <p><b>7. Does your school have written policies or practices concerning <u>healthy eating</u>?</b></p> <p><input type="checkbox"/> <b>Yes, existing written policies</b></p> <p><input type="checkbox"/> <b>Yes, written policies still under development</b></p> <p><input type="checkbox"/> <b>Yes, practices</b></p> <p><input type="checkbox"/> <b>No</b></p> <p><input type="checkbox"/> <b>N/A</b></p>                                                                                                                                                                           |
| Forward  | <p>10. Există în școala dumneavoastră <i>politici</i> sau <i>practici</i> privind <b>alimentația sănătoasă</b>?</p> <p>De exemplu: interzicerea anumitor alimente în școală (<b>politică</b>), evenimente centrate pe gătitul în mod sănătos (<b>practică</b>) etc.</p> <p><i>Da, există politici scrise / Da, există politici, dar nu sunt încă scrise / Da, există practici / Nu există politici sau practici</i></p>                                                                                                                                                                |
| Backward | <p>10. Are there <b>healthy eating</b> policies or practices in your school?</p> <p>For example: banning certain foods in school (<b>politics</b>), events centered on healthy cooking (<b>practice</b>) etc.</p> <p><i>Yes, there are written policies / Yes, there are policies, but they are not yet written / Yes, there are practices / No policies or practices</i></p>                                                                                                                                                                                                          |
| Original | (none)                                                                                                                                                                                                                                                                                                                                                                                                                                                                                                                                                                                 |
| Adapted  | <p>11. Dacă ați răspuns DA la întrebarea precedentă, vă rugăm elaborați asupra <i>politicilor</i> și/sau <i>practicilor</i> implementate la nivelul școlii în care activați pentru promovarea alimentației sănătoase.</p>                                                                                                                                                                                                                                                                                                                                                              |
| Backward | <p>11. If you answered YES to the previous question, please elaborate on the policies and/or practices implemented at the level of your school to promote healthy eating.</p>                                                                                                                                                                                                                                                                                                                                                                                                          |

| Original                                                             | <p><b>8. Does your school have a committee that oversees or offers guidance on the development of policies and practices concerning physical activity and healthy eating at your school (e.g., health action team, school health or wellness council)?</b></p> <p> <input type="checkbox"/> <b>Yes, both physical activity and healthy eating</b><br/> <input type="checkbox"/> <b>Yes, physical activity only</b><br/> <input type="checkbox"/> <b>Yes, healthy eating only</b><br/> <input type="checkbox"/> <b>No</b> </p>                                                                                                                                                                                                                                                                                                                                                                                                                                                                                                                                                                                                                                                                                                                                                                         |                          |                          |                          |                          |        |      |                                  |                          |                          |                          |                          |                          |                                                                      |                          |                          |                          |                          |                          |                                                  |                          |                          |                          |                          |                          |                                                       |                          |                          |                          |                          |                          |
|----------------------------------------------------------------------|-------------------------------------------------------------------------------------------------------------------------------------------------------------------------------------------------------------------------------------------------------------------------------------------------------------------------------------------------------------------------------------------------------------------------------------------------------------------------------------------------------------------------------------------------------------------------------------------------------------------------------------------------------------------------------------------------------------------------------------------------------------------------------------------------------------------------------------------------------------------------------------------------------------------------------------------------------------------------------------------------------------------------------------------------------------------------------------------------------------------------------------------------------------------------------------------------------------------------------------------------------------------------------------------------------|--------------------------|--------------------------|--------------------------|--------------------------|--------|------|----------------------------------|--------------------------|--------------------------|--------------------------|--------------------------|--------------------------|----------------------------------------------------------------------|--------------------------|--------------------------|--------------------------|--------------------------|--------------------------|--------------------------------------------------|--------------------------|--------------------------|--------------------------|--------------------------|--------------------------|-------------------------------------------------------|--------------------------|--------------------------|--------------------------|--------------------------|--------------------------|
| Forward                                                              | <p>12. Există la nivelul școlii o <i>comisie</i> sau altă formă organizată care se ocupă cu propuneri privind dezvoltarea de politici și/sau practici privind activitatea fizică și alimentația sănătoasă?</p> <p>De exemplu, membri din consiliul elevilor responsabili cu aceste sarcini, membri din comitetul părinților sau din corpul profesoral grupați într-o comisie sau altă formă de organizare etc.</p> <p><i>Da - atât pentru activitate fizică, cât și pentru alimentație sănătoasă / Da - doar pentru activitate fizică / Da - doar pentru alimentație sănătoasă / Nu</i></p>                                                                                                                                                                                                                                                                                                                                                                                                                                                                                                                                                                                                                                                                                                           |                          |                          |                          |                          |        |      |                                  |                          |                          |                          |                          |                          |                                                                      |                          |                          |                          |                          |                          |                                                  |                          |                          |                          |                          |                          |                                                       |                          |                          |                          |                          |                          |
| Backward                                                             | <p>12. Is there a <i>committee</i> or other organization at the school level in charge of proposals on the development of policies and/or practices on physical activity and healthy eating?</p> <p>For example, members of the student council responsible for these tasks, members of the parents' committee or of the faculty grouped in a committee or other form of organization, etc.</p> <p><i>Yes - both for physical activity and for healthy eating / Yes - only for physical activity / Yes - only for healthy eating / No</i></p>                                                                                                                                                                                                                                                                                                                                                                                                                                                                                                                                                                                                                                                                                                                                                         |                          |                          |                          |                          |        |      |                                  |                          |                          |                          |                          |                          |                                                                      |                          |                          |                          |                          |                          |                                                  |                          |                          |                          |                          |                          |                                                       |                          |                          |                          |                          |                          |
| Original                                                             | <b>C. PHYSICAL ACTIVITY</b>                                                                                                                                                                                                                                                                                                                                                                                                                                                                                                                                                                                                                                                                                                                                                                                                                                                                                                                                                                                                                                                                                                                                                                                                                                                                           |                          |                          |                          |                          |        |      |                                  |                          |                          |                          |                          |                          |                                                                      |                          |                          |                          |                          |                          |                                                  |                          |                          |                          |                          |                          |                                                       |                          |                          |                          |                          |                          |
| Forward                                                              | <b>C. Activitatea fizică din școală</b>                                                                                                                                                                                                                                                                                                                                                                                                                                                                                                                                                                                                                                                                                                                                                                                                                                                                                                                                                                                                                                                                                                                                                                                                                                                               |                          |                          |                          |                          |        |      |                                  |                          |                          |                          |                          |                          |                                                                      |                          |                          |                          |                          |                          |                                                  |                          |                          |                          |                          |                          |                                                       |                          |                          |                          |                          |                          |
| Backward                                                             | <b>C. Physical activity in school</b>                                                                                                                                                                                                                                                                                                                                                                                                                                                                                                                                                                                                                                                                                                                                                                                                                                                                                                                                                                                                                                                                                                                                                                                                                                                                 |                          |                          |                          |                          |        |      |                                  |                          |                          |                          |                          |                          |                                                                      |                          |                          |                          |                          |                          |                                                  |                          |                          |                          |                          |                          |                                                       |                          |                          |                          |                          |                          |
| Original                                                             | <p><b>9. What percent of students participate in the following extracurricular activities offered by your school?</b><br/>(Please estimate)</p> <table border="1"> <thead> <tr> <th></th><th>Not available</th><th>Less than 10%</th><th>10-24%</th><th>25-49%</th><th>50%+</th></tr> </thead> <tbody> <tr> <td>a. Varsity/interschool athletics</td><td><input type="checkbox"/></td><td><input type="checkbox"/></td><td><input type="checkbox"/></td><td><input type="checkbox"/></td><td><input type="checkbox"/></td></tr> <tr> <td>b. Intramural athletics or physical activity clubs (including dance)</td><td><input type="checkbox"/></td><td><input type="checkbox"/></td><td><input type="checkbox"/></td><td><input type="checkbox"/></td><td><input type="checkbox"/></td></tr> <tr> <td>c. Academic/hobby clubs (e.g., chess, astronomy)</td><td><input type="checkbox"/></td><td><input type="checkbox"/></td><td><input type="checkbox"/></td><td><input type="checkbox"/></td><td><input type="checkbox"/></td></tr> <tr> <td>d. Arts-based clubs (e.g., drama, music, photography)</td><td><input type="checkbox"/></td><td><input type="checkbox"/></td><td><input type="checkbox"/></td><td><input type="checkbox"/></td><td><input type="checkbox"/></td></tr> </tbody> </table> |                          | Not available            | Less than 10%            | 10-24%                   | 25-49% | 50%+ | a. Varsity/interschool athletics | <input type="checkbox"/> | b. Intramural athletics or physical activity clubs (including dance) | <input type="checkbox"/> | c. Academic/hobby clubs (e.g., chess, astronomy) | <input type="checkbox"/> | d. Arts-based clubs (e.g., drama, music, photography) | <input type="checkbox"/> |
|                                                                      | Not available                                                                                                                                                                                                                                                                                                                                                                                                                                                                                                                                                                                                                                                                                                                                                                                                                                                                                                                                                                                                                                                                                                                                                                                                                                                                                         | Less than 10%            | 10-24%                   | 25-49%                   | 50%+                     |        |      |                                  |                          |                          |                          |                          |                          |                                                                      |                          |                          |                          |                          |                          |                                                  |                          |                          |                          |                          |                          |                                                       |                          |                          |                          |                          |                          |
| a. Varsity/interschool athletics                                     | <input type="checkbox"/>                                                                                                                                                                                                                                                                                                                                                                                                                                                                                                                                                                                                                                                                                                                                                                                                                                                                                                                                                                                                                                                                                                                                                                                                                                                                              | <input type="checkbox"/> | <input type="checkbox"/> | <input type="checkbox"/> | <input type="checkbox"/> |        |      |                                  |                          |                          |                          |                          |                          |                                                                      |                          |                          |                          |                          |                          |                                                  |                          |                          |                          |                          |                          |                                                       |                          |                          |                          |                          |                          |
| b. Intramural athletics or physical activity clubs (including dance) | <input type="checkbox"/>                                                                                                                                                                                                                                                                                                                                                                                                                                                                                                                                                                                                                                                                                                                                                                                                                                                                                                                                                                                                                                                                                                                                                                                                                                                                              | <input type="checkbox"/> | <input type="checkbox"/> | <input type="checkbox"/> | <input type="checkbox"/> |        |      |                                  |                          |                          |                          |                          |                          |                                                                      |                          |                          |                          |                          |                          |                                                  |                          |                          |                          |                          |                          |                                                       |                          |                          |                          |                          |                          |
| c. Academic/hobby clubs (e.g., chess, astronomy)                     | <input type="checkbox"/>                                                                                                                                                                                                                                                                                                                                                                                                                                                                                                                                                                                                                                                                                                                                                                                                                                                                                                                                                                                                                                                                                                                                                                                                                                                                              | <input type="checkbox"/> | <input type="checkbox"/> | <input type="checkbox"/> | <input type="checkbox"/> |        |      |                                  |                          |                          |                          |                          |                          |                                                                      |                          |                          |                          |                          |                          |                                                  |                          |                          |                          |                          |                          |                                                       |                          |                          |                          |                          |                          |
| d. Arts-based clubs (e.g., drama, music, photography)                | <input type="checkbox"/>                                                                                                                                                                                                                                                                                                                                                                                                                                                                                                                                                                                                                                                                                                                                                                                                                                                                                                                                                                                                                                                                                                                                                                                                                                                                              | <input type="checkbox"/> | <input type="checkbox"/> | <input type="checkbox"/> | <input type="checkbox"/> |        |      |                                  |                          |                          |                          |                          |                          |                                                                      |                          |                          |                          |                          |                          |                                                  |                          |                          |                          |                          |                          |                                                       |                          |                          |                          |                          |                          |
| Forward                                                              | <p>13. Vă rugăm estimați ce procent de elevi ai școlii participă la următoarele activități:</p> <p><i>Campionate sportive interșcolare / Cluburi/cercuri sportive în școală (inclusiv dans) / Cercuri de pregătire pe discipline în școală / Cluburi/cercuri pentru hobby-uri în școală (șah, modelism, etc.) / Cluburi/cercuri artistice în școală (desen, muzică, teatru, fotografie, etc.);</i></p> <p><i>Indisponibil / &lt;10% / 10-24% / 25-49% / 50% +</i></p>                                                                                                                                                                                                                                                                                                                                                                                                                                                                                                                                                                                                                                                                                                                                                                                                                                 |                          |                          |                          |                          |        |      |                                  |                          |                          |                          |                          |                          |                                                                      |                          |                          |                          |                          |                          |                                                  |                          |                          |                          |                          |                          |                                                       |                          |                          |                          |                          |                          |
| Backward                                                             | <p>13. Please estimate what percentage of the school's students participate in the following activities:</p> <p><i>Inter-school sports competitions / School sports clubs/courses (including dance) / Academic clubs / School hobby clubs/courses (chess, modeling, etc.), School art clubs/courses (drawing, music, theatre, photo, etc.);</i></p>                                                                                                                                                                                                                                                                                                                                                                                                                                                                                                                                                                                                                                                                                                                                                                                                                                                                                                                                                   |                          |                          |                          |                          |        |      |                                  |                          |                          |                          |                          |                          |                                                                      |                          |                          |                          |                          |                          |                                                  |                          |                          |                          |                          |                          |                                                       |                          |                          |                          |                          |                          |

|                      | Unavailable / <10% / 10-24% / 25-49% / 50%+                                                                                                                                                                                                                                                                                                                                                                                                                                                                                                                                                                                                                                                                                                                                                                                                                                                                                                                                                                                                                                                                                                                                                                                                                                                                                                                                                                                                                                                                                                                                                                                                                                                                                                                                                                                                                                                                                                                                                                                                                         |                          |                         |                          |                          |                         |            |               |                          |                          |               |                          |                          |               |                          |                          |              |                          |                          |           |                          |                          |                  |                          |                          |             |                          |                          |              |                          |                          |                      |                          |                          |             |                          |                          |          |                          |                          |           |                          |                          |               |                          |                          |                     |                          |                          |             |                          |                          |          |                          |                          |
|----------------------|---------------------------------------------------------------------------------------------------------------------------------------------------------------------------------------------------------------------------------------------------------------------------------------------------------------------------------------------------------------------------------------------------------------------------------------------------------------------------------------------------------------------------------------------------------------------------------------------------------------------------------------------------------------------------------------------------------------------------------------------------------------------------------------------------------------------------------------------------------------------------------------------------------------------------------------------------------------------------------------------------------------------------------------------------------------------------------------------------------------------------------------------------------------------------------------------------------------------------------------------------------------------------------------------------------------------------------------------------------------------------------------------------------------------------------------------------------------------------------------------------------------------------------------------------------------------------------------------------------------------------------------------------------------------------------------------------------------------------------------------------------------------------------------------------------------------------------------------------------------------------------------------------------------------------------------------------------------------------------------------------------------------------------------------------------------------|--------------------------|-------------------------|--------------------------|--------------------------|-------------------------|------------|---------------|--------------------------|--------------------------|---------------|--------------------------|--------------------------|---------------|--------------------------|--------------------------|--------------|--------------------------|--------------------------|-----------|--------------------------|--------------------------|------------------|--------------------------|--------------------------|-------------|--------------------------|--------------------------|--------------|--------------------------|--------------------------|----------------------|--------------------------|--------------------------|-------------|--------------------------|--------------------------|----------|--------------------------|--------------------------|-----------|--------------------------|--------------------------|---------------|--------------------------|--------------------------|---------------------|--------------------------|--------------------------|-------------|--------------------------|--------------------------|----------|--------------------------|--------------------------|
| Original             | <p><b>11. From the following list, please indicate which sports are offered in your interschool or intramural athletics programs available to students in grade 4:</b></p> <p><input type="checkbox"/> a. Not applicable, school does not offer interschool or intramural athletics to students in grade 4</p> <table border="1"> <thead> <tr> <th></th><th>Varsity/<br/>Interschool</th><th>Intramural</th><th></th><th>Varsity/<br/>Interschool</th><th>Intramural</th></tr> </thead> <tbody> <tr> <td>b. Basketball</td><td><input type="checkbox"/></td><td><input type="checkbox"/></td><td>j. Gymnastics</td><td><input type="checkbox"/></td><td><input type="checkbox"/></td></tr> <tr> <td>c. Volleyball</td><td><input type="checkbox"/></td><td><input type="checkbox"/></td><td>k. Wrestling</td><td><input type="checkbox"/></td><td><input type="checkbox"/></td></tr> <tr> <td>d. Soccer</td><td><input type="checkbox"/></td><td><input type="checkbox"/></td><td>l. Track &amp; Field</td><td><input type="checkbox"/></td><td><input type="checkbox"/></td></tr> <tr> <td>e. Football</td><td><input type="checkbox"/></td><td><input type="checkbox"/></td><td>m. Badminton</td><td><input type="checkbox"/></td><td><input type="checkbox"/></td></tr> <tr> <td>f. Baseball/softball</td><td><input type="checkbox"/></td><td><input type="checkbox"/></td><td>n. Swimming</td><td><input type="checkbox"/></td><td><input type="checkbox"/></td></tr> <tr> <td>g. Rugby</td><td><input type="checkbox"/></td><td><input type="checkbox"/></td><td>o. Skiing</td><td><input type="checkbox"/></td><td><input type="checkbox"/></td></tr> <tr> <td>h. Ice Hockey</td><td><input type="checkbox"/></td><td><input type="checkbox"/></td><td>p. Ultimate Frisbee</td><td><input type="checkbox"/></td><td><input type="checkbox"/></td></tr> <tr> <td>i. Lacrosse</td><td><input type="checkbox"/></td><td><input type="checkbox"/></td><td>q. Other</td><td><input type="checkbox"/></td><td><input type="checkbox"/></td></tr> </tbody> </table> |                          | Varsity/<br>Interschool | Intramural               |                          | Varsity/<br>Interschool | Intramural | b. Basketball | <input type="checkbox"/> | <input type="checkbox"/> | j. Gymnastics | <input type="checkbox"/> | <input type="checkbox"/> | c. Volleyball | <input type="checkbox"/> | <input type="checkbox"/> | k. Wrestling | <input type="checkbox"/> | <input type="checkbox"/> | d. Soccer | <input type="checkbox"/> | <input type="checkbox"/> | l. Track & Field | <input type="checkbox"/> | <input type="checkbox"/> | e. Football | <input type="checkbox"/> | <input type="checkbox"/> | m. Badminton | <input type="checkbox"/> | <input type="checkbox"/> | f. Baseball/softball | <input type="checkbox"/> | <input type="checkbox"/> | n. Swimming | <input type="checkbox"/> | <input type="checkbox"/> | g. Rugby | <input type="checkbox"/> | <input type="checkbox"/> | o. Skiing | <input type="checkbox"/> | <input type="checkbox"/> | h. Ice Hockey | <input type="checkbox"/> | <input type="checkbox"/> | p. Ultimate Frisbee | <input type="checkbox"/> | <input type="checkbox"/> | i. Lacrosse | <input type="checkbox"/> | <input type="checkbox"/> | q. Other | <input type="checkbox"/> | <input type="checkbox"/> |
|                      | Varsity/<br>Interschool                                                                                                                                                                                                                                                                                                                                                                                                                                                                                                                                                                                                                                                                                                                                                                                                                                                                                                                                                                                                                                                                                                                                                                                                                                                                                                                                                                                                                                                                                                                                                                                                                                                                                                                                                                                                                                                                                                                                                                                                                                             | Intramural               |                         | Varsity/<br>Interschool  | Intramural               |                         |            |               |                          |                          |               |                          |                          |               |                          |                          |              |                          |                          |           |                          |                          |                  |                          |                          |             |                          |                          |              |                          |                          |                      |                          |                          |             |                          |                          |          |                          |                          |           |                          |                          |               |                          |                          |                     |                          |                          |             |                          |                          |          |                          |                          |
| b. Basketball        | <input type="checkbox"/>                                                                                                                                                                                                                                                                                                                                                                                                                                                                                                                                                                                                                                                                                                                                                                                                                                                                                                                                                                                                                                                                                                                                                                                                                                                                                                                                                                                                                                                                                                                                                                                                                                                                                                                                                                                                                                                                                                                                                                                                                                            | <input type="checkbox"/> | j. Gymnastics           | <input type="checkbox"/> | <input type="checkbox"/> |                         |            |               |                          |                          |               |                          |                          |               |                          |                          |              |                          |                          |           |                          |                          |                  |                          |                          |             |                          |                          |              |                          |                          |                      |                          |                          |             |                          |                          |          |                          |                          |           |                          |                          |               |                          |                          |                     |                          |                          |             |                          |                          |          |                          |                          |
| c. Volleyball        | <input type="checkbox"/>                                                                                                                                                                                                                                                                                                                                                                                                                                                                                                                                                                                                                                                                                                                                                                                                                                                                                                                                                                                                                                                                                                                                                                                                                                                                                                                                                                                                                                                                                                                                                                                                                                                                                                                                                                                                                                                                                                                                                                                                                                            | <input type="checkbox"/> | k. Wrestling            | <input type="checkbox"/> | <input type="checkbox"/> |                         |            |               |                          |                          |               |                          |                          |               |                          |                          |              |                          |                          |           |                          |                          |                  |                          |                          |             |                          |                          |              |                          |                          |                      |                          |                          |             |                          |                          |          |                          |                          |           |                          |                          |               |                          |                          |                     |                          |                          |             |                          |                          |          |                          |                          |
| d. Soccer            | <input type="checkbox"/>                                                                                                                                                                                                                                                                                                                                                                                                                                                                                                                                                                                                                                                                                                                                                                                                                                                                                                                                                                                                                                                                                                                                                                                                                                                                                                                                                                                                                                                                                                                                                                                                                                                                                                                                                                                                                                                                                                                                                                                                                                            | <input type="checkbox"/> | l. Track & Field        | <input type="checkbox"/> | <input type="checkbox"/> |                         |            |               |                          |                          |               |                          |                          |               |                          |                          |              |                          |                          |           |                          |                          |                  |                          |                          |             |                          |                          |              |                          |                          |                      |                          |                          |             |                          |                          |          |                          |                          |           |                          |                          |               |                          |                          |                     |                          |                          |             |                          |                          |          |                          |                          |
| e. Football          | <input type="checkbox"/>                                                                                                                                                                                                                                                                                                                                                                                                                                                                                                                                                                                                                                                                                                                                                                                                                                                                                                                                                                                                                                                                                                                                                                                                                                                                                                                                                                                                                                                                                                                                                                                                                                                                                                                                                                                                                                                                                                                                                                                                                                            | <input type="checkbox"/> | m. Badminton            | <input type="checkbox"/> | <input type="checkbox"/> |                         |            |               |                          |                          |               |                          |                          |               |                          |                          |              |                          |                          |           |                          |                          |                  |                          |                          |             |                          |                          |              |                          |                          |                      |                          |                          |             |                          |                          |          |                          |                          |           |                          |                          |               |                          |                          |                     |                          |                          |             |                          |                          |          |                          |                          |
| f. Baseball/softball | <input type="checkbox"/>                                                                                                                                                                                                                                                                                                                                                                                                                                                                                                                                                                                                                                                                                                                                                                                                                                                                                                                                                                                                                                                                                                                                                                                                                                                                                                                                                                                                                                                                                                                                                                                                                                                                                                                                                                                                                                                                                                                                                                                                                                            | <input type="checkbox"/> | n. Swimming             | <input type="checkbox"/> | <input type="checkbox"/> |                         |            |               |                          |                          |               |                          |                          |               |                          |                          |              |                          |                          |           |                          |                          |                  |                          |                          |             |                          |                          |              |                          |                          |                      |                          |                          |             |                          |                          |          |                          |                          |           |                          |                          |               |                          |                          |                     |                          |                          |             |                          |                          |          |                          |                          |
| g. Rugby             | <input type="checkbox"/>                                                                                                                                                                                                                                                                                                                                                                                                                                                                                                                                                                                                                                                                                                                                                                                                                                                                                                                                                                                                                                                                                                                                                                                                                                                                                                                                                                                                                                                                                                                                                                                                                                                                                                                                                                                                                                                                                                                                                                                                                                            | <input type="checkbox"/> | o. Skiing               | <input type="checkbox"/> | <input type="checkbox"/> |                         |            |               |                          |                          |               |                          |                          |               |                          |                          |              |                          |                          |           |                          |                          |                  |                          |                          |             |                          |                          |              |                          |                          |                      |                          |                          |             |                          |                          |          |                          |                          |           |                          |                          |               |                          |                          |                     |                          |                          |             |                          |                          |          |                          |                          |
| h. Ice Hockey        | <input type="checkbox"/>                                                                                                                                                                                                                                                                                                                                                                                                                                                                                                                                                                                                                                                                                                                                                                                                                                                                                                                                                                                                                                                                                                                                                                                                                                                                                                                                                                                                                                                                                                                                                                                                                                                                                                                                                                                                                                                                                                                                                                                                                                            | <input type="checkbox"/> | p. Ultimate Frisbee     | <input type="checkbox"/> | <input type="checkbox"/> |                         |            |               |                          |                          |               |                          |                          |               |                          |                          |              |                          |                          |           |                          |                          |                  |                          |                          |             |                          |                          |              |                          |                          |                      |                          |                          |             |                          |                          |          |                          |                          |           |                          |                          |               |                          |                          |                     |                          |                          |             |                          |                          |          |                          |                          |
| i. Lacrosse          | <input type="checkbox"/>                                                                                                                                                                                                                                                                                                                                                                                                                                                                                                                                                                                                                                                                                                                                                                                                                                                                                                                                                                                                                                                                                                                                                                                                                                                                                                                                                                                                                                                                                                                                                                                                                                                                                                                                                                                                                                                                                                                                                                                                                                            | <input type="checkbox"/> | q. Other                | <input type="checkbox"/> | <input type="checkbox"/> |                         |            |               |                          |                          |               |                          |                          |               |                          |                          |              |                          |                          |           |                          |                          |                  |                          |                          |             |                          |                          |              |                          |                          |                      |                          |                          |             |                          |                          |          |                          |                          |           |                          |                          |               |                          |                          |                     |                          |                          |             |                          |                          |          |                          |                          |
| Forward              | <p>14. Vă rugăm selectați care dintre următoarele sporturi se practică <b>organizat</b> în mod <b>extracurricular</b> în școala dumneavoastră sub formă de antrenamente și/sau în competiții interșcolare.</p> <p><i>Baschet / Volei / Fotbal / Tenis / Gimnastică / Badminton / Altele;</i></p> <p><i>Antrenamente extracurriculare în școală / Competiții interșcolare / Nu se aplică</i></p>                                                                                                                                                                                                                                                                                                                                                                                                                                                                                                                                                                                                                                                                                                                                                                                                                                                                                                                                                                                                                                                                                                                                                                                                                                                                                                                                                                                                                                                                                                                                                                                                                                                                     |                          |                         |                          |                          |                         |            |               |                          |                          |               |                          |                          |               |                          |                          |              |                          |                          |           |                          |                          |                  |                          |                          |             |                          |                          |              |                          |                          |                      |                          |                          |             |                          |                          |          |                          |                          |           |                          |                          |               |                          |                          |                     |                          |                          |             |                          |                          |          |                          |                          |
| Backward             | <p>14. Please select which of the following sports is practiced <b>in an organized</b> manner <b>as an extracurricular activity</b> in your school in the form of training and/or inter-school competitions.</p> <p><i>Basketball / Volleyball / Football / Tennis / Gymnastics / Badminton / Other;</i></p> <p><i>Extracurricular training in school / inter-school competitions / not applicable</i></p>                                                                                                                                                                                                                                                                                                                                                                                                                                                                                                                                                                                                                                                                                                                                                                                                                                                                                                                                                                                                                                                                                                                                                                                                                                                                                                                                                                                                                                                                                                                                                                                                                                                          |                          |                         |                          |                          |                         |            |               |                          |                          |               |                          |                          |               |                          |                          |              |                          |                          |           |                          |                          |                  |                          |                          |             |                          |                          |              |                          |                          |                      |                          |                          |             |                          |                          |          |                          |                          |           |                          |                          |               |                          |                          |                     |                          |                          |             |                          |                          |          |                          |                          |
| Original             | (none)                                                                                                                                                                                                                                                                                                                                                                                                                                                                                                                                                                                                                                                                                                                                                                                                                                                                                                                                                                                                                                                                                                                                                                                                                                                                                                                                                                                                                                                                                                                                                                                                                                                                                                                                                                                                                                                                                                                                                                                                                                                              |                          |                         |                          |                          |                         |            |               |                          |                          |               |                          |                          |               |                          |                          |              |                          |                          |           |                          |                          |                  |                          |                          |             |                          |                          |              |                          |                          |                      |                          |                          |             |                          |                          |          |                          |                          |           |                          |                          |               |                          |                          |                     |                          |                          |             |                          |                          |          |                          |                          |
| Adapted              | 15. Dacă ați răspuns Altele la întrebarea precedentă, vă rugăm precizați care anume.                                                                                                                                                                                                                                                                                                                                                                                                                                                                                                                                                                                                                                                                                                                                                                                                                                                                                                                                                                                                                                                                                                                                                                                                                                                                                                                                                                                                                                                                                                                                                                                                                                                                                                                                                                                                                                                                                                                                                                                |                          |                         |                          |                          |                         |            |               |                          |                          |               |                          |                          |               |                          |                          |              |                          |                          |           |                          |                          |                  |                          |                          |             |                          |                          |              |                          |                          |                      |                          |                          |             |                          |                          |          |                          |                          |           |                          |                          |               |                          |                          |                     |                          |                          |             |                          |                          |          |                          |                          |
| Backward             | 15. If you answered "Other" in the previous question, please specify which one.                                                                                                                                                                                                                                                                                                                                                                                                                                                                                                                                                                                                                                                                                                                                                                                                                                                                                                                                                                                                                                                                                                                                                                                                                                                                                                                                                                                                                                                                                                                                                                                                                                                                                                                                                                                                                                                                                                                                                                                     |                          |                         |                          |                          |                         |            |               |                          |                          |               |                          |                          |               |                          |                          |              |                          |                          |           |                          |                          |                  |                          |                          |             |                          |                          |              |                          |                          |                      |                          |                          |             |                          |                          |          |                          |                          |           |                          |                          |               |                          |                          |                     |                          |                          |             |                          |                          |          |                          |                          |
| Original             | <p><b>10. Does your school offer late bus/transportation service to students who participate in extra-curricular activities?</b></p> <p>Yes <input type="checkbox"/> No <input type="checkbox"/></p>                                                                                                                                                                                                                                                                                                                                                                                                                                                                                                                                                                                                                                                                                                                                                                                                                                                                                                                                                                                                                                                                                                                                                                                                                                                                                                                                                                                                                                                                                                                                                                                                                                                                                                                                                                                                                                                                |                          |                         |                          |                          |                         |            |               |                          |                          |               |                          |                          |               |                          |                          |              |                          |                          |           |                          |                          |                  |                          |                          |             |                          |                          |              |                          |                          |                      |                          |                          |             |                          |                          |          |                          |                          |           |                          |                          |               |                          |                          |                     |                          |                          |             |                          |                          |          |                          |                          |
| Forward              | <p>16. Școala dumneavoastră oferă transport organizat elevilor care participă la activități extracurriculare?</p> <p><i>Da, întotdeauna / Da, uneori / Nu</i></p>                                                                                                                                                                                                                                                                                                                                                                                                                                                                                                                                                                                                                                                                                                                                                                                                                                                                                                                                                                                                                                                                                                                                                                                                                                                                                                                                                                                                                                                                                                                                                                                                                                                                                                                                                                                                                                                                                                   |                          |                         |                          |                          |                         |            |               |                          |                          |               |                          |                          |               |                          |                          |              |                          |                          |           |                          |                          |                  |                          |                          |             |                          |                          |              |                          |                          |                      |                          |                          |             |                          |                          |          |                          |                          |           |                          |                          |               |                          |                          |                     |                          |                          |             |                          |                          |          |                          |                          |
| Backward             | <p>16. Does your school offer transportation to students participating in extracurricular activities?</p> <p><i>Yes, always / yes, sometimes / no</i></p>                                                                                                                                                                                                                                                                                                                                                                                                                                                                                                                                                                                                                                                                                                                                                                                                                                                                                                                                                                                                                                                                                                                                                                                                                                                                                                                                                                                                                                                                                                                                                                                                                                                                                                                                                                                                                                                                                                           |                          |                         |                          |                          |                         |            |               |                          |                          |               |                          |                          |               |                          |                          |              |                          |                          |           |                          |                          |                  |                          |                          |             |                          |                          |              |                          |                          |                      |                          |                          |             |                          |                          |          |                          |                          |           |                          |                          |               |                          |                          |                     |                          |                          |             |                          |                          |          |                          |                          |
| Original             | <b>For the following questions, please consider students in grade 4 when answering.</b>                                                                                                                                                                                                                                                                                                                                                                                                                                                                                                                                                                                                                                                                                                                                                                                                                                                                                                                                                                                                                                                                                                                                                                                                                                                                                                                                                                                                                                                                                                                                                                                                                                                                                                                                                                                                                                                                                                                                                                             |                          |                         |                          |                          |                         |            |               |                          |                          |               |                          |                          |               |                          |                          |              |                          |                          |           |                          |                          |                  |                          |                          |             |                          |                          |              |                          |                          |                      |                          |                          |             |                          |                          |          |                          |                          |           |                          |                          |               |                          |                          |                     |                          |                          |             |                          |                          |          |                          |                          |
| Adapted              | (Removed)                                                                                                                                                                                                                                                                                                                                                                                                                                                                                                                                                                                                                                                                                                                                                                                                                                                                                                                                                                                                                                                                                                                                                                                                                                                                                                                                                                                                                                                                                                                                                                                                                                                                                                                                                                                                                                                                                                                                                                                                                                                           |                          |                         |                          |                          |                         |            |               |                          |                          |               |                          |                          |               |                          |                          |              |                          |                          |           |                          |                          |                  |                          |                          |             |                          |                          |              |                          |                          |                      |                          |                          |             |                          |                          |          |                          |                          |           |                          |                          |               |                          |                          |                     |                          |                          |             |                          |                          |          |                          |                          |
| Original             | <p><b>12. How many breaks of 15 to 29 minutes do students in grade 4 have in a day?</b></p> <p><input type="checkbox"/> zero <input type="checkbox"/> 1 <input type="checkbox"/> 2 <input type="checkbox"/> 3 or more</p>                                                                                                                                                                                                                                                                                                                                                                                                                                                                                                                                                                                                                                                                                                                                                                                                                                                                                                                                                                                                                                                                                                                                                                                                                                                                                                                                                                                                                                                                                                                                                                                                                                                                                                                                                                                                                                           |                          |                         |                          |                          |                         |            |               |                          |                          |               |                          |                          |               |                          |                          |              |                          |                          |           |                          |                          |                  |                          |                          |             |                          |                          |              |                          |                          |                      |                          |                          |             |                          |                          |          |                          |                          |           |                          |                          |               |                          |                          |                     |                          |                          |             |                          |                          |          |                          |                          |



| Forward                                                                                                                  | 17. Câte pauze de <b>15-29 de minute</b> au elevii care învață la școala dumneavoastră pe zi?<br><i>0 / 1 / 2 / 3 sau mai multe</i>                                                                                                                                                                                                                                                                                                                                                                                                                                                                                                                                                                                                                                                                                                                                                                                                                                                                                                                                                                                                                                                                                                                                                                                                                                                              |                          |                          |                          |                          |                   |                   |                                         |                          |                          |                          |                          |                          |                                                                     |                          |                          |                          |                          |                          |                                                               |                          |                          |                          |                          |                          |                                                                                                                          |                          |                          |                          |                          |                          |
|--------------------------------------------------------------------------------------------------------------------------|--------------------------------------------------------------------------------------------------------------------------------------------------------------------------------------------------------------------------------------------------------------------------------------------------------------------------------------------------------------------------------------------------------------------------------------------------------------------------------------------------------------------------------------------------------------------------------------------------------------------------------------------------------------------------------------------------------------------------------------------------------------------------------------------------------------------------------------------------------------------------------------------------------------------------------------------------------------------------------------------------------------------------------------------------------------------------------------------------------------------------------------------------------------------------------------------------------------------------------------------------------------------------------------------------------------------------------------------------------------------------------------------------|--------------------------|--------------------------|--------------------------|--------------------------|-------------------|-------------------|-----------------------------------------|--------------------------|--------------------------|--------------------------|--------------------------|--------------------------|---------------------------------------------------------------------|--------------------------|--------------------------|--------------------------|--------------------------|--------------------------|---------------------------------------------------------------|--------------------------|--------------------------|--------------------------|--------------------------|--------------------------|--------------------------------------------------------------------------------------------------------------------------|--------------------------|--------------------------|--------------------------|--------------------------|--------------------------|
| Backward                                                                                                                 | 17. How many <b>15-29 minute</b> breaks do students at your school have per day?<br><i>0 / 1 / 2 / 3 or more</i>                                                                                                                                                                                                                                                                                                                                                                                                                                                                                                                                                                                                                                                                                                                                                                                                                                                                                                                                                                                                                                                                                                                                                                                                                                                                                 |                          |                          |                          |                          |                   |                   |                                         |                          |                          |                          |                          |                          |                                                                     |                          |                          |                          |                          |                          |                                                               |                          |                          |                          |                          |                          |                                                                                                                          |                          |                          |                          |                          |                          |
| Original                                                                                                                 | <b>13. How many breaks of 30 minutes or more do students in grade 4 have in a day?</b><br><input type="checkbox"/> zero <input type="checkbox"/> 1 <input type="checkbox"/> 2 <input type="checkbox"/> 3 or more                                                                                                                                                                                                                                                                                                                                                                                                                                                                                                                                                                                                                                                                                                                                                                                                                                                                                                                                                                                                                                                                                                                                                                                 |                          |                          |                          |                          |                   |                   |                                         |                          |                          |                          |                          |                          |                                                                     |                          |                          |                          |                          |                          |                                                               |                          |                          |                          |                          |                          |                                                                                                                          |                          |                          |                          |                          |                          |
| Forward                                                                                                                  | 18. Câte pauze de <b>30 de minute sau mai mult</b> au elevii care învață la școala dumneavoastră pe zi?<br><i>0 / 1 / 2 / 3 sau mai multe</i>                                                                                                                                                                                                                                                                                                                                                                                                                                                                                                                                                                                                                                                                                                                                                                                                                                                                                                                                                                                                                                                                                                                                                                                                                                                    |                          |                          |                          |                          |                   |                   |                                         |                          |                          |                          |                          |                          |                                                                     |                          |                          |                          |                          |                          |                                                               |                          |                          |                          |                          |                          |                                                                                                                          |                          |                          |                          |                          |                          |
| Backward                                                                                                                 | 18. How many breaks of <b>30 minutes or more</b> do students at your school have per day?<br><i>0 / 1 / 2 / 3 or more</i>                                                                                                                                                                                                                                                                                                                                                                                                                                                                                                                                                                                                                                                                                                                                                                                                                                                                                                                                                                                                                                                                                                                                                                                                                                                                        |                          |                          |                          |                          |                   |                   |                                         |                          |                          |                          |                          |                          |                                                                     |                          |                          |                          |                          |                          |                                                               |                          |                          |                          |                          |                          |                                                                                                                          |                          |                          |                          |                          |                          |
| Original                                                                                                                 | <b>14. How much class time is mandated by your [Province/Territory/State...] to be allotted to physical education (PE)/Daily Physical Activity (DPA) for students in grade 4?</b><br>_____ minutes per [check the box indicating the time unit] week <input type="checkbox"/> day <input type="checkbox"/><br><input type="checkbox"/> No specific amount is mandated                                                                                                                                                                                                                                                                                                                                                                                                                                                                                                                                                                                                                                                                                                                                                                                                                                                                                                                                                                                                                            |                          |                          |                          |                          |                   |                   |                                         |                          |                          |                          |                          |                          |                                                                     |                          |                          |                          |                          |                          |                                                               |                          |                          |                          |                          |                          |                                                                                                                          |                          |                          |                          |                          |                          |
| Adapted                                                                                                                  | (Removed)                                                                                                                                                                                                                                                                                                                                                                                                                                                                                                                                                                                                                                                                                                                                                                                                                                                                                                                                                                                                                                                                                                                                                                                                                                                                                                                                                                                        |                          |                          |                          |                          |                   |                   |                                         |                          |                          |                          |                          |                          |                                                                     |                          |                          |                          |                          |                          |                                                               |                          |                          |                          |                          |                          |                                                                                                                          |                          |                          |                          |                          |                          |
| Original                                                                                                                 | <b>15. Compared to the class time allotted to physical education (PE)/Daily Physical Activity (DPA) for grade 4 as mandated by your [Province/Territory/State...], do students in grade 4 in your school receive on average:</b><br><input type="checkbox"/> Less than the mandated amount<br><input type="checkbox"/> Approximately the mandated amount<br><input type="checkbox"/> More than the mandated amount<br><input type="checkbox"/> No specific amount is mandated                                                                                                                                                                                                                                                                                                                                                                                                                                                                                                                                                                                                                                                                                                                                                                                                                                                                                                                    |                          |                          |                          |                          |                   |                   |                                         |                          |                          |                          |                          |                          |                                                                     |                          |                          |                          |                          |                          |                                                               |                          |                          |                          |                          |                          |                                                                                                                          |                          |                          |                          |                          |                          |
| Adapted                                                                                                                  | (Removed)                                                                                                                                                                                                                                                                                                                                                                                                                                                                                                                                                                                                                                                                                                                                                                                                                                                                                                                                                                                                                                                                                                                                                                                                                                                                                                                                                                                        |                          |                          |                          |                          |                   |                   |                                         |                          |                          |                          |                          |                          |                                                                     |                          |                          |                          |                          |                          |                                                               |                          |                          |                          |                          |                          |                                                                                                                          |                          |                          |                          |                          |                          |
| Original                                                                                                                 | <b>16. To the best of your knowledge, how well do each of the following statements characterize your school?</b><br><table border="1"> <thead> <tr> <th></th><th><i>A lot</i></th><th><i>Some</i></th><th><i>Very little</i></th><th><i>Not at all</i></th><th><i>Don't know</i></th></tr> </thead> <tbody> <tr> <td>a. We use physical activity as a reward</td><td><input type="checkbox"/></td><td><input type="checkbox"/></td><td><input type="checkbox"/></td><td><input type="checkbox"/></td><td><input type="checkbox"/></td></tr> <tr> <td>b. We promote physical activity during or as part of special events</td><td><input type="checkbox"/></td><td><input type="checkbox"/></td><td><input type="checkbox"/></td><td><input type="checkbox"/></td><td><input type="checkbox"/></td></tr> <tr> <td>c. We integrate physical activity into other curriculum areas</td><td><input type="checkbox"/></td><td><input type="checkbox"/></td><td><input type="checkbox"/></td><td><input type="checkbox"/></td><td><input type="checkbox"/></td></tr> <tr> <td>d. We use physical activity as a punishment for bad behavior (e.g., withholding recess, administering push-ups or laps).</td><td><input type="checkbox"/></td><td><input type="checkbox"/></td><td><input type="checkbox"/></td><td><input type="checkbox"/></td><td><input type="checkbox"/></td></tr> </tbody> </table> |                          | <i>A lot</i>             | <i>Some</i>              | <i>Very little</i>       | <i>Not at all</i> | <i>Don't know</i> | a. We use physical activity as a reward | <input type="checkbox"/> | b. We promote physical activity during or as part of special events | <input type="checkbox"/> | c. We integrate physical activity into other curriculum areas | <input type="checkbox"/> | d. We use physical activity as a punishment for bad behavior (e.g., withholding recess, administering push-ups or laps). | <input type="checkbox"/> |
|                                                                                                                          | <i>A lot</i>                                                                                                                                                                                                                                                                                                                                                                                                                                                                                                                                                                                                                                                                                                                                                                                                                                                                                                                                                                                                                                                                                                                                                                                                                                                                                                                                                                                     | <i>Some</i>              | <i>Very little</i>       | <i>Not at all</i>        | <i>Don't know</i>        |                   |                   |                                         |                          |                          |                          |                          |                          |                                                                     |                          |                          |                          |                          |                          |                                                               |                          |                          |                          |                          |                          |                                                                                                                          |                          |                          |                          |                          |                          |
| a. We use physical activity as a reward                                                                                  | <input type="checkbox"/>                                                                                                                                                                                                                                                                                                                                                                                                                                                                                                                                                                                                                                                                                                                                                                                                                                                                                                                                                                                                                                                                                                                                                                                                                                                                                                                                                                         | <input type="checkbox"/> | <input type="checkbox"/> | <input type="checkbox"/> | <input type="checkbox"/> |                   |                   |                                         |                          |                          |                          |                          |                          |                                                                     |                          |                          |                          |                          |                          |                                                               |                          |                          |                          |                          |                          |                                                                                                                          |                          |                          |                          |                          |                          |
| b. We promote physical activity during or as part of special events                                                      | <input type="checkbox"/>                                                                                                                                                                                                                                                                                                                                                                                                                                                                                                                                                                                                                                                                                                                                                                                                                                                                                                                                                                                                                                                                                                                                                                                                                                                                                                                                                                         | <input type="checkbox"/> | <input type="checkbox"/> | <input type="checkbox"/> | <input type="checkbox"/> |                   |                   |                                         |                          |                          |                          |                          |                          |                                                                     |                          |                          |                          |                          |                          |                                                               |                          |                          |                          |                          |                          |                                                                                                                          |                          |                          |                          |                          |                          |
| c. We integrate physical activity into other curriculum areas                                                            | <input type="checkbox"/>                                                                                                                                                                                                                                                                                                                                                                                                                                                                                                                                                                                                                                                                                                                                                                                                                                                                                                                                                                                                                                                                                                                                                                                                                                                                                                                                                                         | <input type="checkbox"/> | <input type="checkbox"/> | <input type="checkbox"/> | <input type="checkbox"/> |                   |                   |                                         |                          |                          |                          |                          |                          |                                                                     |                          |                          |                          |                          |                          |                                                               |                          |                          |                          |                          |                          |                                                                                                                          |                          |                          |                          |                          |                          |
| d. We use physical activity as a punishment for bad behavior (e.g., withholding recess, administering push-ups or laps). | <input type="checkbox"/>                                                                                                                                                                                                                                                                                                                                                                                                                                                                                                                                                                                                                                                                                                                                                                                                                                                                                                                                                                                                                                                                                                                                                                                                                                                                                                                                                                         | <input type="checkbox"/> | <input type="checkbox"/> | <input type="checkbox"/> | <input type="checkbox"/> |                   |                   |                                         |                          |                          |                          |                          |                          |                                                                     |                          |                          |                          |                          |                          |                                                               |                          |                          |                          |                          |                          |                                                                                                                          |                          |                          |                          |                          |                          |
| Forward                                                                                                                  | 19. Din câte știți, cum apreciați valoarea de adevăr a următoarelor afirmații?<br><i>Utilizăm activitatea fizică sub formă de recompense /</i><br><i>Promovăm activitatea fizică în cadrul unor evenimente speciale /</i><br><i>Integrăm activitatea fizică în cadrul altor curicule în afara orelor de sport (de exemplu sub forma orelor în aer liber) /</i><br><i>Utilizăm activitatea fizică sub formă de pedeapsă (de exemplu interzicerea părăsirii clasei în pauză, efectuarea de ture de teren etc.);</i><br><i>Deloc / Foarte puțin / Puțin / Mult / Foarte mult</i>                                                                                                                                                                                                                                                                                                                                                                                                                                                                                                                                                                                                                                                                                                                                                                                                                    |                          |                          |                          |                          |                   |                   |                                         |                          |                          |                          |                          |                          |                                                                     |                          |                          |                          |                          |                          |                                                               |                          |                          |                          |                          |                          |                                                                                                                          |                          |                          |                          |                          |                          |
| Backward                                                                                                                 | 19. As far as you know, how do you assess the truth value of the following statements?                                                                                                                                                                                                                                                                                                                                                                                                                                                                                                                                                                                                                                                                                                                                                                                                                                                                                                                                                                                                                                                                                                                                                                                                                                                                                                           |                          |                          |                          |                          |                   |                   |                                         |                          |                          |                          |                          |                          |                                                                     |                          |                          |                          |                          |                          |                                                               |                          |                          |                          |                          |                          |                                                                                                                          |                          |                          |                          |                          |                          |

|                                                                                                                                                                                                               | <p><i>We use physical activity as reward/</i></p> <p><i>We promote physical activity during special events /</i></p> <p><i>We integrate physical activity into other curricula outside of sports hours (e.g. in the form of outdoor classes) /</i></p> <p><i>We use physical activity as punishment (e.g. Prohibition of leaving class on break, doing field laps, etc.);</i></p> <p><i>Not at all / very little / little / much / very much</i></p>                                                                                                                                                                                                                                                                                                                                                                                                                                                                                                                                                                                                                                                                                                                                                                                                                                                                                                                                                                                                                                                                                                                                                                                                                                                                                                                                                                                                                                                   |                          |                          |    |            |                                                                                                                    |                          |                          |                          |                                                                                     |                          |                          |                          |                                                                                |                          |                          |                          |                                                        |                          |                          |                          |                                                                                                                |                          |                          |                          |                                                                                                                      |                          |                          |                          |                                                                                                                                                                                                               |                          |                          |                          |
|---------------------------------------------------------------------------------------------------------------------------------------------------------------------------------------------------------------|--------------------------------------------------------------------------------------------------------------------------------------------------------------------------------------------------------------------------------------------------------------------------------------------------------------------------------------------------------------------------------------------------------------------------------------------------------------------------------------------------------------------------------------------------------------------------------------------------------------------------------------------------------------------------------------------------------------------------------------------------------------------------------------------------------------------------------------------------------------------------------------------------------------------------------------------------------------------------------------------------------------------------------------------------------------------------------------------------------------------------------------------------------------------------------------------------------------------------------------------------------------------------------------------------------------------------------------------------------------------------------------------------------------------------------------------------------------------------------------------------------------------------------------------------------------------------------------------------------------------------------------------------------------------------------------------------------------------------------------------------------------------------------------------------------------------------------------------------------------------------------------------------------|--------------------------|--------------------------|----|------------|--------------------------------------------------------------------------------------------------------------------|--------------------------|--------------------------|--------------------------|-------------------------------------------------------------------------------------|--------------------------|--------------------------|--------------------------|--------------------------------------------------------------------------------|--------------------------|--------------------------|--------------------------|--------------------------------------------------------|--------------------------|--------------------------|--------------------------|----------------------------------------------------------------------------------------------------------------|--------------------------|--------------------------|--------------------------|----------------------------------------------------------------------------------------------------------------------|--------------------------|--------------------------|--------------------------|---------------------------------------------------------------------------------------------------------------------------------------------------------------------------------------------------------------|--------------------------|--------------------------|--------------------------|
| Original                                                                                                                                                                                                      | <p><b>17. Does your school promote active transportation to and from school in any of the following ways?</b></p> <table border="1"> <thead> <tr> <th></th><th>Yes</th><th>No</th><th>Don't know</th></tr> </thead> <tbody> <tr> <td>a. Identify safe routes to use for walking and cycling to and from school (e.g., with signs, in newsletters, etc.)</td><td><input type="checkbox"/></td><td><input type="checkbox"/></td><td><input type="checkbox"/></td></tr> <tr> <td>b. Provide crossing guards at intersections to encourage safe walk-to-school routes</td><td><input type="checkbox"/></td><td><input type="checkbox"/></td><td><input type="checkbox"/></td></tr> <tr> <td>c. Designate a 'car free zone' to provide safe walking areas around the school</td><td><input type="checkbox"/></td><td><input type="checkbox"/></td><td><input type="checkbox"/></td></tr> <tr> <td>d. Allow students to bring bicycles on school property</td><td><input type="checkbox"/></td><td><input type="checkbox"/></td><td><input type="checkbox"/></td></tr> <tr> <td>e. Allow students to bring small wheel vehicles (e.g., rollerblades, scooters, skateboards) on school property</td><td><input type="checkbox"/></td><td><input type="checkbox"/></td><td><input type="checkbox"/></td></tr> <tr> <td>f. Encourage the use of helmets and safety gear for those who use bicycles and small wheel vehicles to get to school</td><td><input type="checkbox"/></td><td><input type="checkbox"/></td><td><input type="checkbox"/></td></tr> <tr> <td>g. Organize occasional 'walk to school days' , walking clubs, or programs like 'walking school buses' (where parents or older students walk around the neighborhood and pick up walkers at designated points)</td><td><input type="checkbox"/></td><td><input type="checkbox"/></td><td><input type="checkbox"/></td></tr> </tbody> </table> |                          | Yes                      | No | Don't know | a. Identify safe routes to use for walking and cycling to and from school (e.g., with signs, in newsletters, etc.) | <input type="checkbox"/> | <input type="checkbox"/> | <input type="checkbox"/> | b. Provide crossing guards at intersections to encourage safe walk-to-school routes | <input type="checkbox"/> | <input type="checkbox"/> | <input type="checkbox"/> | c. Designate a 'car free zone' to provide safe walking areas around the school | <input type="checkbox"/> | <input type="checkbox"/> | <input type="checkbox"/> | d. Allow students to bring bicycles on school property | <input type="checkbox"/> | <input type="checkbox"/> | <input type="checkbox"/> | e. Allow students to bring small wheel vehicles (e.g., rollerblades, scooters, skateboards) on school property | <input type="checkbox"/> | <input type="checkbox"/> | <input type="checkbox"/> | f. Encourage the use of helmets and safety gear for those who use bicycles and small wheel vehicles to get to school | <input type="checkbox"/> | <input type="checkbox"/> | <input type="checkbox"/> | g. Organize occasional 'walk to school days' , walking clubs, or programs like 'walking school buses' (where parents or older students walk around the neighborhood and pick up walkers at designated points) | <input type="checkbox"/> | <input type="checkbox"/> | <input type="checkbox"/> |
|                                                                                                                                                                                                               | Yes                                                                                                                                                                                                                                                                                                                                                                                                                                                                                                                                                                                                                                                                                                                                                                                                                                                                                                                                                                                                                                                                                                                                                                                                                                                                                                                                                                                                                                                                                                                                                                                                                                                                                                                                                                                                                                                                                                    | No                       | Don't know               |    |            |                                                                                                                    |                          |                          |                          |                                                                                     |                          |                          |                          |                                                                                |                          |                          |                          |                                                        |                          |                          |                          |                                                                                                                |                          |                          |                          |                                                                                                                      |                          |                          |                          |                                                                                                                                                                                                               |                          |                          |                          |
| a. Identify safe routes to use for walking and cycling to and from school (e.g., with signs, in newsletters, etc.)                                                                                            | <input type="checkbox"/>                                                                                                                                                                                                                                                                                                                                                                                                                                                                                                                                                                                                                                                                                                                                                                                                                                                                                                                                                                                                                                                                                                                                                                                                                                                                                                                                                                                                                                                                                                                                                                                                                                                                                                                                                                                                                                                                               | <input type="checkbox"/> | <input type="checkbox"/> |    |            |                                                                                                                    |                          |                          |                          |                                                                                     |                          |                          |                          |                                                                                |                          |                          |                          |                                                        |                          |                          |                          |                                                                                                                |                          |                          |                          |                                                                                                                      |                          |                          |                          |                                                                                                                                                                                                               |                          |                          |                          |
| b. Provide crossing guards at intersections to encourage safe walk-to-school routes                                                                                                                           | <input type="checkbox"/>                                                                                                                                                                                                                                                                                                                                                                                                                                                                                                                                                                                                                                                                                                                                                                                                                                                                                                                                                                                                                                                                                                                                                                                                                                                                                                                                                                                                                                                                                                                                                                                                                                                                                                                                                                                                                                                                               | <input type="checkbox"/> | <input type="checkbox"/> |    |            |                                                                                                                    |                          |                          |                          |                                                                                     |                          |                          |                          |                                                                                |                          |                          |                          |                                                        |                          |                          |                          |                                                                                                                |                          |                          |                          |                                                                                                                      |                          |                          |                          |                                                                                                                                                                                                               |                          |                          |                          |
| c. Designate a 'car free zone' to provide safe walking areas around the school                                                                                                                                | <input type="checkbox"/>                                                                                                                                                                                                                                                                                                                                                                                                                                                                                                                                                                                                                                                                                                                                                                                                                                                                                                                                                                                                                                                                                                                                                                                                                                                                                                                                                                                                                                                                                                                                                                                                                                                                                                                                                                                                                                                                               | <input type="checkbox"/> | <input type="checkbox"/> |    |            |                                                                                                                    |                          |                          |                          |                                                                                     |                          |                          |                          |                                                                                |                          |                          |                          |                                                        |                          |                          |                          |                                                                                                                |                          |                          |                          |                                                                                                                      |                          |                          |                          |                                                                                                                                                                                                               |                          |                          |                          |
| d. Allow students to bring bicycles on school property                                                                                                                                                        | <input type="checkbox"/>                                                                                                                                                                                                                                                                                                                                                                                                                                                                                                                                                                                                                                                                                                                                                                                                                                                                                                                                                                                                                                                                                                                                                                                                                                                                                                                                                                                                                                                                                                                                                                                                                                                                                                                                                                                                                                                                               | <input type="checkbox"/> | <input type="checkbox"/> |    |            |                                                                                                                    |                          |                          |                          |                                                                                     |                          |                          |                          |                                                                                |                          |                          |                          |                                                        |                          |                          |                          |                                                                                                                |                          |                          |                          |                                                                                                                      |                          |                          |                          |                                                                                                                                                                                                               |                          |                          |                          |
| e. Allow students to bring small wheel vehicles (e.g., rollerblades, scooters, skateboards) on school property                                                                                                | <input type="checkbox"/>                                                                                                                                                                                                                                                                                                                                                                                                                                                                                                                                                                                                                                                                                                                                                                                                                                                                                                                                                                                                                                                                                                                                                                                                                                                                                                                                                                                                                                                                                                                                                                                                                                                                                                                                                                                                                                                                               | <input type="checkbox"/> | <input type="checkbox"/> |    |            |                                                                                                                    |                          |                          |                          |                                                                                     |                          |                          |                          |                                                                                |                          |                          |                          |                                                        |                          |                          |                          |                                                                                                                |                          |                          |                          |                                                                                                                      |                          |                          |                          |                                                                                                                                                                                                               |                          |                          |                          |
| f. Encourage the use of helmets and safety gear for those who use bicycles and small wheel vehicles to get to school                                                                                          | <input type="checkbox"/>                                                                                                                                                                                                                                                                                                                                                                                                                                                                                                                                                                                                                                                                                                                                                                                                                                                                                                                                                                                                                                                                                                                                                                                                                                                                                                                                                                                                                                                                                                                                                                                                                                                                                                                                                                                                                                                                               | <input type="checkbox"/> | <input type="checkbox"/> |    |            |                                                                                                                    |                          |                          |                          |                                                                                     |                          |                          |                          |                                                                                |                          |                          |                          |                                                        |                          |                          |                          |                                                                                                                |                          |                          |                          |                                                                                                                      |                          |                          |                          |                                                                                                                                                                                                               |                          |                          |                          |
| g. Organize occasional 'walk to school days' , walking clubs, or programs like 'walking school buses' (where parents or older students walk around the neighborhood and pick up walkers at designated points) | <input type="checkbox"/>                                                                                                                                                                                                                                                                                                                                                                                                                                                                                                                                                                                                                                                                                                                                                                                                                                                                                                                                                                                                                                                                                                                                                                                                                                                                                                                                                                                                                                                                                                                                                                                                                                                                                                                                                                                                                                                                               | <input type="checkbox"/> | <input type="checkbox"/> |    |            |                                                                                                                    |                          |                          |                          |                                                                                     |                          |                          |                          |                                                                                |                          |                          |                          |                                                        |                          |                          |                          |                                                                                                                |                          |                          |                          |                                                                                                                      |                          |                          |                          |                                                                                                                                                                                                               |                          |                          |                          |
| Forward                                                                                                                                                                                                       | <p>20. Din câte știți, promovează școala dumneavoastră transportul <b>activ fizic</b> al elevilor către școală în vreunul din următoarele moduri?</p> <p><i>Identificarea rutelor sigure pentru accesul pedestru sau pe bicicletă către școală (ex: marcare prin articole în revista școlii sau pe site-ul instituției, afișe postate pe rute etc.) /</i></p> <p><i>Permiterea accesului cu biciclete pe proprietatea școlii /</i></p> <p><i>Permiterea accesului cu role, skate-boarduri sau trotinete pe proprietatea școlii /</i></p> <p><i>Încurajarea purtării căștilor sau a altor echipamente de protecție pentru elevii care utilizează bicicletă/role/trotinetă/etc. pentru transportul către școală (inclusiv prin postere afișate în școală etc.) /</i></p> <p><i>Organizare de evenimente de tipul „autobuzul pedestru” (organizare de puncte de întâlnire, similar unor stații de autobuz, pentru a aduna elevi care să meargă în continuare pe jos către școală) sau „ziua mersului cu bicicleta la școală”;</i></p> <p><i>Da/Nu</i></p>                                                                                                                                                                                                                                                                                                                                                                                                                                                                                                                                                                                                                                                                                                                                                                                                                                                 |                          |                          |    |            |                                                                                                                    |                          |                          |                          |                                                                                     |                          |                          |                          |                                                                                |                          |                          |                          |                                                        |                          |                          |                          |                                                                                                                |                          |                          |                          |                                                                                                                      |                          |                          |                          |                                                                                                                                                                                                               |                          |                          |                          |
| Backward                                                                                                                                                                                                      | <p>20. As far as you know, does your school promote active physical transportation of students to school in any of the following ways?</p> <p><i>Identification of safe routes for pedestrian or bicycle access to the school (e.g. marking by articles in the school magazine or on the institution's website, posters etc.) /</i></p> <p><i>Bicycle access on school property /</i></p> <p><i>Allowing access with rollers, skateboards, or scooters on schoolproperty /</i></p> <p><i>Encouraging the wearing of bicycle helmets or other protective equipment for students using</i></p>                                                                                                                                                                                                                                                                                                                                                                                                                                                                                                                                                                                                                                                                                                                                                                                                                                                                                                                                                                                                                                                                                                                                                                                                                                                                                                           |                          |                          |    |            |                                                                                                                    |                          |                          |                          |                                                                                     |                          |                          |                          |                                                                                |                          |                          |                          |                                                        |                          |                          |                          |                                                                                                                |                          |                          |                          |                                                                                                                      |                          |                          |                          |                                                                                                                                                                                                               |                          |                          |                          |

|                                                                                                                                             | <p>bicycles / rollers/scooters/etc. for transport to the school (including through posters displayed in the school, etc.) /</p> <p>Organization of events such as "walking bus" (Organization of meeting points, similar to bus stops, to gather students to continue walking to the school) or "day of cycling to school";</p> <p>Yes/No</p>                                                                                                                                                                                                                                                                                                                                                                                                                                                                                                                                                                                                                                                                                                                                                                                                                                                                                                                                                                                                                                                                                                                                                                                                                                                                                                                                                                                                                                                                                                                                                                                                                                                                                                                                                                                                                                                                                                                                                                                                                                                                                                                                                                                                                                                                                                                                                                                                                                                                                                                                                                                                                                                                                                                                                                                                                                                                                                                                                                                                                                                                                                                                                                                                                                                                                                                                                                                                                                                                                                                                                                                                                                                                                                                                                                                                                                                                                                                                                                                                                                                                                                                                                                                                                                                               |                          |                              |                          |                              |    |            |              |                          |                          |                          |                          |                          |                                                                                                |                          |                          |                          |                          |                          |                                                      |                          |                          |                          |                          |                          |                  |                          |                          |                          |                          |                          |                                                    |                          |                          |                          |                          |                          |                                                                                                                                             |                          |                          |                          |                          |                          |                       |                          |                          |                          |                          |                          |                         |                          |                          |                          |                          |                          |                                                                          |                          |                          |                          |                          |                          |                                                                      |                          |                          |                          |                          |                          |                                                                |                          |                          |                          |                          |                          |                  |                          |                          |                          |                          |                          |                                                                   |                          |                          |                          |                          |                          |                           |                          |                          |                          |                          |                          |                                                             |                          |                          |                          |                          |                          |             |                          |                          |                          |                          |                          |               |                          |                          |                          |                          |                          |
|---------------------------------------------------------------------------------------------------------------------------------------------|-------------------------------------------------------------------------------------------------------------------------------------------------------------------------------------------------------------------------------------------------------------------------------------------------------------------------------------------------------------------------------------------------------------------------------------------------------------------------------------------------------------------------------------------------------------------------------------------------------------------------------------------------------------------------------------------------------------------------------------------------------------------------------------------------------------------------------------------------------------------------------------------------------------------------------------------------------------------------------------------------------------------------------------------------------------------------------------------------------------------------------------------------------------------------------------------------------------------------------------------------------------------------------------------------------------------------------------------------------------------------------------------------------------------------------------------------------------------------------------------------------------------------------------------------------------------------------------------------------------------------------------------------------------------------------------------------------------------------------------------------------------------------------------------------------------------------------------------------------------------------------------------------------------------------------------------------------------------------------------------------------------------------------------------------------------------------------------------------------------------------------------------------------------------------------------------------------------------------------------------------------------------------------------------------------------------------------------------------------------------------------------------------------------------------------------------------------------------------------------------------------------------------------------------------------------------------------------------------------------------------------------------------------------------------------------------------------------------------------------------------------------------------------------------------------------------------------------------------------------------------------------------------------------------------------------------------------------------------------------------------------------------------------------------------------------------------------------------------------------------------------------------------------------------------------------------------------------------------------------------------------------------------------------------------------------------------------------------------------------------------------------------------------------------------------------------------------------------------------------------------------------------------------------------------------------------------------------------------------------------------------------------------------------------------------------------------------------------------------------------------------------------------------------------------------------------------------------------------------------------------------------------------------------------------------------------------------------------------------------------------------------------------------------------------------------------------------------------------------------------------------------------------------------------------------------------------------------------------------------------------------------------------------------------------------------------------------------------------------------------------------------------------------------------------------------------------------------------------------------------------------------------------------------------------------------------------------------------------------------|--------------------------|------------------------------|--------------------------|------------------------------|----|------------|--------------|--------------------------|--------------------------|--------------------------|--------------------------|--------------------------|------------------------------------------------------------------------------------------------|--------------------------|--------------------------|--------------------------|--------------------------|--------------------------|------------------------------------------------------|--------------------------|--------------------------|--------------------------|--------------------------|--------------------------|------------------|--------------------------|--------------------------|--------------------------|--------------------------|--------------------------|----------------------------------------------------|--------------------------|--------------------------|--------------------------|--------------------------|--------------------------|---------------------------------------------------------------------------------------------------------------------------------------------|--------------------------|--------------------------|--------------------------|--------------------------|--------------------------|-----------------------|--------------------------|--------------------------|--------------------------|--------------------------|--------------------------|-------------------------|--------------------------|--------------------------|--------------------------|--------------------------|--------------------------|--------------------------------------------------------------------------|--------------------------|--------------------------|--------------------------|--------------------------|--------------------------|----------------------------------------------------------------------|--------------------------|--------------------------|--------------------------|--------------------------|--------------------------|----------------------------------------------------------------|--------------------------|--------------------------|--------------------------|--------------------------|--------------------------|------------------|--------------------------|--------------------------|--------------------------|--------------------------|--------------------------|-------------------------------------------------------------------|--------------------------|--------------------------|--------------------------|--------------------------|--------------------------|---------------------------|--------------------------|--------------------------|--------------------------|--------------------------|--------------------------|-------------------------------------------------------------|--------------------------|--------------------------|--------------------------|--------------------------|--------------------------|-------------|--------------------------|--------------------------|--------------------------|--------------------------|--------------------------|---------------|--------------------------|--------------------------|--------------------------|--------------------------|--------------------------|
| Original                                                                                                                                    | <b>D. SCHOOL FACILITIES</b>                                                                                                                                                                                                                                                                                                                                                                                                                                                                                                                                                                                                                                                                                                                                                                                                                                                                                                                                                                                                                                                                                                                                                                                                                                                                                                                                                                                                                                                                                                                                                                                                                                                                                                                                                                                                                                                                                                                                                                                                                                                                                                                                                                                                                                                                                                                                                                                                                                                                                                                                                                                                                                                                                                                                                                                                                                                                                                                                                                                                                                                                                                                                                                                                                                                                                                                                                                                                                                                                                                                                                                                                                                                                                                                                                                                                                                                                                                                                                                                                                                                                                                                                                                                                                                                                                                                                                                                                                                                                                                                                                                                 |                          |                              |                          |                              |    |            |              |                          |                          |                          |                          |                          |                                                                                                |                          |                          |                          |                          |                          |                                                      |                          |                          |                          |                          |                          |                  |                          |                          |                          |                          |                          |                                                    |                          |                          |                          |                          |                          |                                                                                                                                             |                          |                          |                          |                          |                          |                       |                          |                          |                          |                          |                          |                         |                          |                          |                          |                          |                          |                                                                          |                          |                          |                          |                          |                          |                                                                      |                          |                          |                          |                          |                          |                                                                |                          |                          |                          |                          |                          |                  |                          |                          |                          |                          |                          |                                                                   |                          |                          |                          |                          |                          |                           |                          |                          |                          |                          |                          |                                                             |                          |                          |                          |                          |                          |             |                          |                          |                          |                          |                          |               |                          |                          |                          |                          |                          |
| Forward                                                                                                                                     | <b>D. Facilitățile școlii</b>                                                                                                                                                                                                                                                                                                                                                                                                                                                                                                                                                                                                                                                                                                                                                                                                                                                                                                                                                                                                                                                                                                                                                                                                                                                                                                                                                                                                                                                                                                                                                                                                                                                                                                                                                                                                                                                                                                                                                                                                                                                                                                                                                                                                                                                                                                                                                                                                                                                                                                                                                                                                                                                                                                                                                                                                                                                                                                                                                                                                                                                                                                                                                                                                                                                                                                                                                                                                                                                                                                                                                                                                                                                                                                                                                                                                                                                                                                                                                                                                                                                                                                                                                                                                                                                                                                                                                                                                                                                                                                                                                                               |                          |                              |                          |                              |    |            |              |                          |                          |                          |                          |                          |                                                                                                |                          |                          |                          |                          |                          |                                                      |                          |                          |                          |                          |                          |                  |                          |                          |                          |                          |                          |                                                    |                          |                          |                          |                          |                          |                                                                                                                                             |                          |                          |                          |                          |                          |                       |                          |                          |                          |                          |                          |                         |                          |                          |                          |                          |                          |                                                                          |                          |                          |                          |                          |                          |                                                                      |                          |                          |                          |                          |                          |                                                                |                          |                          |                          |                          |                          |                  |                          |                          |                          |                          |                          |                                                                   |                          |                          |                          |                          |                          |                           |                          |                          |                          |                          |                          |                                                             |                          |                          |                          |                          |                          |             |                          |                          |                          |                          |                          |               |                          |                          |                          |                          |                          |
| Backward                                                                                                                                    | <b>D. School facilities</b>                                                                                                                                                                                                                                                                                                                                                                                                                                                                                                                                                                                                                                                                                                                                                                                                                                                                                                                                                                                                                                                                                                                                                                                                                                                                                                                                                                                                                                                                                                                                                                                                                                                                                                                                                                                                                                                                                                                                                                                                                                                                                                                                                                                                                                                                                                                                                                                                                                                                                                                                                                                                                                                                                                                                                                                                                                                                                                                                                                                                                                                                                                                                                                                                                                                                                                                                                                                                                                                                                                                                                                                                                                                                                                                                                                                                                                                                                                                                                                                                                                                                                                                                                                                                                                                                                                                                                                                                                                                                                                                                                                                 |                          |                              |                          |                              |    |            |              |                          |                          |                          |                          |                          |                                                                                                |                          |                          |                          |                          |                          |                                                      |                          |                          |                          |                          |                          |                  |                          |                          |                          |                          |                          |                                                    |                          |                          |                          |                          |                          |                                                                                                                                             |                          |                          |                          |                          |                          |                       |                          |                          |                          |                          |                          |                         |                          |                          |                          |                          |                          |                                                                          |                          |                          |                          |                          |                          |                                                                      |                          |                          |                          |                          |                          |                                                                |                          |                          |                          |                          |                          |                  |                          |                          |                          |                          |                          |                                                                   |                          |                          |                          |                          |                          |                           |                          |                          |                          |                          |                          |                                                             |                          |                          |                          |                          |                          |             |                          |                          |                          |                          |                          |               |                          |                          |                          |                          |                          |
| Original                                                                                                                                    | <p><b>18. Do the majority of students at your school have regular access to any of the following during school hours*?</b><br/>           *During school hours means from the first bell to the last bell, including both instructional and non-instructional time (e.g., lunch).</p> <table border="1"> <thead> <tr> <th></th><th>Yes, on grounds only</th><th>Yes, off grounds only</th><th>Yes, both on and off grounds</th><th>No</th><th>Don't know</th></tr> </thead> <tbody> <tr> <td>a. Gymnasium</td><td><input type="checkbox"/></td><td><input type="checkbox"/></td><td><input type="checkbox"/></td><td><input type="checkbox"/></td><td><input type="checkbox"/></td></tr> <tr> <td>b. Other large room suitable for physical activity (e.g., auditorium, cafeteria, dance studio)</td><td><input type="checkbox"/></td><td><input type="checkbox"/></td><td><input type="checkbox"/></td><td><input type="checkbox"/></td><td><input type="checkbox"/></td></tr> <tr> <td>c. Fitness room for aerobic and/or strength training</td><td><input type="checkbox"/></td><td><input type="checkbox"/></td><td><input type="checkbox"/></td><td><input type="checkbox"/></td><td><input type="checkbox"/></td></tr> <tr> <td>d. Running track</td><td><input type="checkbox"/></td><td><input type="checkbox"/></td><td><input type="checkbox"/></td><td><input type="checkbox"/></td><td><input type="checkbox"/></td></tr> <tr> <td>e. Outdoor sports field (e.g., football or soccer)</td><td><input type="checkbox"/></td><td><input type="checkbox"/></td><td><input type="checkbox"/></td><td><input type="checkbox"/></td><td><input type="checkbox"/></td></tr> <tr> <td>f. Outdoor paved area (e.g., tennis courts, basketball courts, any paved area that can be used for active games like skipping or hopscotch)</td><td><input type="checkbox"/></td><td><input type="checkbox"/></td><td><input type="checkbox"/></td><td><input type="checkbox"/></td><td><input type="checkbox"/></td></tr> <tr> <td>g. Skating rink/arena</td><td><input type="checkbox"/></td><td><input type="checkbox"/></td><td><input type="checkbox"/></td><td><input type="checkbox"/></td><td><input type="checkbox"/></td></tr> <tr> <td>h. Indoor swimming pool</td><td><input type="checkbox"/></td><td><input type="checkbox"/></td><td><input type="checkbox"/></td><td><input type="checkbox"/></td><td><input type="checkbox"/></td></tr> <tr> <td>i. Secure change room lockers available for use during physical activity</td><td><input type="checkbox"/></td><td><input type="checkbox"/></td><td><input type="checkbox"/></td><td><input type="checkbox"/></td><td><input type="checkbox"/></td></tr> <tr> <td>j. Change rooms available for use before and after physical activity</td><td><input type="checkbox"/></td><td><input type="checkbox"/></td><td><input type="checkbox"/></td><td><input type="checkbox"/></td><td><input type="checkbox"/></td></tr> <tr> <td>k. Showers available for use before or after physical activity</td><td><input type="checkbox"/></td><td><input type="checkbox"/></td><td><input type="checkbox"/></td><td><input type="checkbox"/></td><td><input type="checkbox"/></td></tr> <tr> <td>l. Bicycle racks</td><td><input type="checkbox"/></td><td><input type="checkbox"/></td><td><input type="checkbox"/></td><td><input type="checkbox"/></td><td><input type="checkbox"/></td></tr> <tr> <td>m. <b>If yes</b>, are the racks in a secure area to avoid theft?</td><td><input type="checkbox"/></td><td><input type="checkbox"/></td><td><input type="checkbox"/></td><td><input type="checkbox"/></td><td><input type="checkbox"/></td></tr> <tr> <td>n. Grassy playground area</td><td><input type="checkbox"/></td><td><input type="checkbox"/></td><td><input type="checkbox"/></td><td><input type="checkbox"/></td><td><input type="checkbox"/></td></tr> <tr> <td>o. Playground equipment (e.g., climbing structures, swings)</td><td><input type="checkbox"/></td><td><input type="checkbox"/></td><td><input type="checkbox"/></td><td><input type="checkbox"/></td><td><input type="checkbox"/></td></tr> <tr> <td>p. Art room</td><td><input type="checkbox"/></td><td><input type="checkbox"/></td><td><input type="checkbox"/></td><td><input type="checkbox"/></td><td><input type="checkbox"/></td></tr> <tr> <td>q. Music room</td><td><input type="checkbox"/></td><td><input type="checkbox"/></td><td><input type="checkbox"/></td><td><input type="checkbox"/></td><td><input type="checkbox"/></td></tr> </tbody> </table> |                          | Yes, on grounds only         | Yes, off grounds only    | Yes, both on and off grounds | No | Don't know | a. Gymnasium | <input type="checkbox"/> | b. Other large room suitable for physical activity (e.g., auditorium, cafeteria, dance studio) | <input type="checkbox"/> | c. Fitness room for aerobic and/or strength training | <input type="checkbox"/> | d. Running track | <input type="checkbox"/> | e. Outdoor sports field (e.g., football or soccer) | <input type="checkbox"/> | f. Outdoor paved area (e.g., tennis courts, basketball courts, any paved area that can be used for active games like skipping or hopscotch) | <input type="checkbox"/> | g. Skating rink/arena | <input type="checkbox"/> | h. Indoor swimming pool | <input type="checkbox"/> | i. Secure change room lockers available for use during physical activity | <input type="checkbox"/> | j. Change rooms available for use before and after physical activity | <input type="checkbox"/> | k. Showers available for use before or after physical activity | <input type="checkbox"/> | l. Bicycle racks | <input type="checkbox"/> | m. <b>If yes</b> , are the racks in a secure area to avoid theft? | <input type="checkbox"/> | n. Grassy playground area | <input type="checkbox"/> | o. Playground equipment (e.g., climbing structures, swings) | <input type="checkbox"/> | p. Art room | <input type="checkbox"/> | q. Music room | <input type="checkbox"/> |
|                                                                                                                                             | Yes, on grounds only                                                                                                                                                                                                                                                                                                                                                                                                                                                                                                                                                                                                                                                                                                                                                                                                                                                                                                                                                                                                                                                                                                                                                                                                                                                                                                                                                                                                                                                                                                                                                                                                                                                                                                                                                                                                                                                                                                                                                                                                                                                                                                                                                                                                                                                                                                                                                                                                                                                                                                                                                                                                                                                                                                                                                                                                                                                                                                                                                                                                                                                                                                                                                                                                                                                                                                                                                                                                                                                                                                                                                                                                                                                                                                                                                                                                                                                                                                                                                                                                                                                                                                                                                                                                                                                                                                                                                                                                                                                                                                                                                                                        | Yes, off grounds only    | Yes, both on and off grounds | No                       | Don't know                   |    |            |              |                          |                          |                          |                          |                          |                                                                                                |                          |                          |                          |                          |                          |                                                      |                          |                          |                          |                          |                          |                  |                          |                          |                          |                          |                          |                                                    |                          |                          |                          |                          |                          |                                                                                                                                             |                          |                          |                          |                          |                          |                       |                          |                          |                          |                          |                          |                         |                          |                          |                          |                          |                          |                                                                          |                          |                          |                          |                          |                          |                                                                      |                          |                          |                          |                          |                          |                                                                |                          |                          |                          |                          |                          |                  |                          |                          |                          |                          |                          |                                                                   |                          |                          |                          |                          |                          |                           |                          |                          |                          |                          |                          |                                                             |                          |                          |                          |                          |                          |             |                          |                          |                          |                          |                          |               |                          |                          |                          |                          |                          |
| a. Gymnasium                                                                                                                                | <input type="checkbox"/>                                                                                                                                                                                                                                                                                                                                                                                                                                                                                                                                                                                                                                                                                                                                                                                                                                                                                                                                                                                                                                                                                                                                                                                                                                                                                                                                                                                                                                                                                                                                                                                                                                                                                                                                                                                                                                                                                                                                                                                                                                                                                                                                                                                                                                                                                                                                                                                                                                                                                                                                                                                                                                                                                                                                                                                                                                                                                                                                                                                                                                                                                                                                                                                                                                                                                                                                                                                                                                                                                                                                                                                                                                                                                                                                                                                                                                                                                                                                                                                                                                                                                                                                                                                                                                                                                                                                                                                                                                                                                                                                                                                    | <input type="checkbox"/> | <input type="checkbox"/>     | <input type="checkbox"/> | <input type="checkbox"/>     |    |            |              |                          |                          |                          |                          |                          |                                                                                                |                          |                          |                          |                          |                          |                                                      |                          |                          |                          |                          |                          |                  |                          |                          |                          |                          |                          |                                                    |                          |                          |                          |                          |                          |                                                                                                                                             |                          |                          |                          |                          |                          |                       |                          |                          |                          |                          |                          |                         |                          |                          |                          |                          |                          |                                                                          |                          |                          |                          |                          |                          |                                                                      |                          |                          |                          |                          |                          |                                                                |                          |                          |                          |                          |                          |                  |                          |                          |                          |                          |                          |                                                                   |                          |                          |                          |                          |                          |                           |                          |                          |                          |                          |                          |                                                             |                          |                          |                          |                          |                          |             |                          |                          |                          |                          |                          |               |                          |                          |                          |                          |                          |
| b. Other large room suitable for physical activity (e.g., auditorium, cafeteria, dance studio)                                              | <input type="checkbox"/>                                                                                                                                                                                                                                                                                                                                                                                                                                                                                                                                                                                                                                                                                                                                                                                                                                                                                                                                                                                                                                                                                                                                                                                                                                                                                                                                                                                                                                                                                                                                                                                                                                                                                                                                                                                                                                                                                                                                                                                                                                                                                                                                                                                                                                                                                                                                                                                                                                                                                                                                                                                                                                                                                                                                                                                                                                                                                                                                                                                                                                                                                                                                                                                                                                                                                                                                                                                                                                                                                                                                                                                                                                                                                                                                                                                                                                                                                                                                                                                                                                                                                                                                                                                                                                                                                                                                                                                                                                                                                                                                                                                    | <input type="checkbox"/> | <input type="checkbox"/>     | <input type="checkbox"/> | <input type="checkbox"/>     |    |            |              |                          |                          |                          |                          |                          |                                                                                                |                          |                          |                          |                          |                          |                                                      |                          |                          |                          |                          |                          |                  |                          |                          |                          |                          |                          |                                                    |                          |                          |                          |                          |                          |                                                                                                                                             |                          |                          |                          |                          |                          |                       |                          |                          |                          |                          |                          |                         |                          |                          |                          |                          |                          |                                                                          |                          |                          |                          |                          |                          |                                                                      |                          |                          |                          |                          |                          |                                                                |                          |                          |                          |                          |                          |                  |                          |                          |                          |                          |                          |                                                                   |                          |                          |                          |                          |                          |                           |                          |                          |                          |                          |                          |                                                             |                          |                          |                          |                          |                          |             |                          |                          |                          |                          |                          |               |                          |                          |                          |                          |                          |
| c. Fitness room for aerobic and/or strength training                                                                                        | <input type="checkbox"/>                                                                                                                                                                                                                                                                                                                                                                                                                                                                                                                                                                                                                                                                                                                                                                                                                                                                                                                                                                                                                                                                                                                                                                                                                                                                                                                                                                                                                                                                                                                                                                                                                                                                                                                                                                                                                                                                                                                                                                                                                                                                                                                                                                                                                                                                                                                                                                                                                                                                                                                                                                                                                                                                                                                                                                                                                                                                                                                                                                                                                                                                                                                                                                                                                                                                                                                                                                                                                                                                                                                                                                                                                                                                                                                                                                                                                                                                                                                                                                                                                                                                                                                                                                                                                                                                                                                                                                                                                                                                                                                                                                                    | <input type="checkbox"/> | <input type="checkbox"/>     | <input type="checkbox"/> | <input type="checkbox"/>     |    |            |              |                          |                          |                          |                          |                          |                                                                                                |                          |                          |                          |                          |                          |                                                      |                          |                          |                          |                          |                          |                  |                          |                          |                          |                          |                          |                                                    |                          |                          |                          |                          |                          |                                                                                                                                             |                          |                          |                          |                          |                          |                       |                          |                          |                          |                          |                          |                         |                          |                          |                          |                          |                          |                                                                          |                          |                          |                          |                          |                          |                                                                      |                          |                          |                          |                          |                          |                                                                |                          |                          |                          |                          |                          |                  |                          |                          |                          |                          |                          |                                                                   |                          |                          |                          |                          |                          |                           |                          |                          |                          |                          |                          |                                                             |                          |                          |                          |                          |                          |             |                          |                          |                          |                          |                          |               |                          |                          |                          |                          |                          |
| d. Running track                                                                                                                            | <input type="checkbox"/>                                                                                                                                                                                                                                                                                                                                                                                                                                                                                                                                                                                                                                                                                                                                                                                                                                                                                                                                                                                                                                                                                                                                                                                                                                                                                                                                                                                                                                                                                                                                                                                                                                                                                                                                                                                                                                                                                                                                                                                                                                                                                                                                                                                                                                                                                                                                                                                                                                                                                                                                                                                                                                                                                                                                                                                                                                                                                                                                                                                                                                                                                                                                                                                                                                                                                                                                                                                                                                                                                                                                                                                                                                                                                                                                                                                                                                                                                                                                                                                                                                                                                                                                                                                                                                                                                                                                                                                                                                                                                                                                                                                    | <input type="checkbox"/> | <input type="checkbox"/>     | <input type="checkbox"/> | <input type="checkbox"/>     |    |            |              |                          |                          |                          |                          |                          |                                                                                                |                          |                          |                          |                          |                          |                                                      |                          |                          |                          |                          |                          |                  |                          |                          |                          |                          |                          |                                                    |                          |                          |                          |                          |                          |                                                                                                                                             |                          |                          |                          |                          |                          |                       |                          |                          |                          |                          |                          |                         |                          |                          |                          |                          |                          |                                                                          |                          |                          |                          |                          |                          |                                                                      |                          |                          |                          |                          |                          |                                                                |                          |                          |                          |                          |                          |                  |                          |                          |                          |                          |                          |                                                                   |                          |                          |                          |                          |                          |                           |                          |                          |                          |                          |                          |                                                             |                          |                          |                          |                          |                          |             |                          |                          |                          |                          |                          |               |                          |                          |                          |                          |                          |
| e. Outdoor sports field (e.g., football or soccer)                                                                                          | <input type="checkbox"/>                                                                                                                                                                                                                                                                                                                                                                                                                                                                                                                                                                                                                                                                                                                                                                                                                                                                                                                                                                                                                                                                                                                                                                                                                                                                                                                                                                                                                                                                                                                                                                                                                                                                                                                                                                                                                                                                                                                                                                                                                                                                                                                                                                                                                                                                                                                                                                                                                                                                                                                                                                                                                                                                                                                                                                                                                                                                                                                                                                                                                                                                                                                                                                                                                                                                                                                                                                                                                                                                                                                                                                                                                                                                                                                                                                                                                                                                                                                                                                                                                                                                                                                                                                                                                                                                                                                                                                                                                                                                                                                                                                                    | <input type="checkbox"/> | <input type="checkbox"/>     | <input type="checkbox"/> | <input type="checkbox"/>     |    |            |              |                          |                          |                          |                          |                          |                                                                                                |                          |                          |                          |                          |                          |                                                      |                          |                          |                          |                          |                          |                  |                          |                          |                          |                          |                          |                                                    |                          |                          |                          |                          |                          |                                                                                                                                             |                          |                          |                          |                          |                          |                       |                          |                          |                          |                          |                          |                         |                          |                          |                          |                          |                          |                                                                          |                          |                          |                          |                          |                          |                                                                      |                          |                          |                          |                          |                          |                                                                |                          |                          |                          |                          |                          |                  |                          |                          |                          |                          |                          |                                                                   |                          |                          |                          |                          |                          |                           |                          |                          |                          |                          |                          |                                                             |                          |                          |                          |                          |                          |             |                          |                          |                          |                          |                          |               |                          |                          |                          |                          |                          |
| f. Outdoor paved area (e.g., tennis courts, basketball courts, any paved area that can be used for active games like skipping or hopscotch) | <input type="checkbox"/>                                                                                                                                                                                                                                                                                                                                                                                                                                                                                                                                                                                                                                                                                                                                                                                                                                                                                                                                                                                                                                                                                                                                                                                                                                                                                                                                                                                                                                                                                                                                                                                                                                                                                                                                                                                                                                                                                                                                                                                                                                                                                                                                                                                                                                                                                                                                                                                                                                                                                                                                                                                                                                                                                                                                                                                                                                                                                                                                                                                                                                                                                                                                                                                                                                                                                                                                                                                                                                                                                                                                                                                                                                                                                                                                                                                                                                                                                                                                                                                                                                                                                                                                                                                                                                                                                                                                                                                                                                                                                                                                                                                    | <input type="checkbox"/> | <input type="checkbox"/>     | <input type="checkbox"/> | <input type="checkbox"/>     |    |            |              |                          |                          |                          |                          |                          |                                                                                                |                          |                          |                          |                          |                          |                                                      |                          |                          |                          |                          |                          |                  |                          |                          |                          |                          |                          |                                                    |                          |                          |                          |                          |                          |                                                                                                                                             |                          |                          |                          |                          |                          |                       |                          |                          |                          |                          |                          |                         |                          |                          |                          |                          |                          |                                                                          |                          |                          |                          |                          |                          |                                                                      |                          |                          |                          |                          |                          |                                                                |                          |                          |                          |                          |                          |                  |                          |                          |                          |                          |                          |                                                                   |                          |                          |                          |                          |                          |                           |                          |                          |                          |                          |                          |                                                             |                          |                          |                          |                          |                          |             |                          |                          |                          |                          |                          |               |                          |                          |                          |                          |                          |
| g. Skating rink/arena                                                                                                                       | <input type="checkbox"/>                                                                                                                                                                                                                                                                                                                                                                                                                                                                                                                                                                                                                                                                                                                                                                                                                                                                                                                                                                                                                                                                                                                                                                                                                                                                                                                                                                                                                                                                                                                                                                                                                                                                                                                                                                                                                                                                                                                                                                                                                                                                                                                                                                                                                                                                                                                                                                                                                                                                                                                                                                                                                                                                                                                                                                                                                                                                                                                                                                                                                                                                                                                                                                                                                                                                                                                                                                                                                                                                                                                                                                                                                                                                                                                                                                                                                                                                                                                                                                                                                                                                                                                                                                                                                                                                                                                                                                                                                                                                                                                                                                                    | <input type="checkbox"/> | <input type="checkbox"/>     | <input type="checkbox"/> | <input type="checkbox"/>     |    |            |              |                          |                          |                          |                          |                          |                                                                                                |                          |                          |                          |                          |                          |                                                      |                          |                          |                          |                          |                          |                  |                          |                          |                          |                          |                          |                                                    |                          |                          |                          |                          |                          |                                                                                                                                             |                          |                          |                          |                          |                          |                       |                          |                          |                          |                          |                          |                         |                          |                          |                          |                          |                          |                                                                          |                          |                          |                          |                          |                          |                                                                      |                          |                          |                          |                          |                          |                                                                |                          |                          |                          |                          |                          |                  |                          |                          |                          |                          |                          |                                                                   |                          |                          |                          |                          |                          |                           |                          |                          |                          |                          |                          |                                                             |                          |                          |                          |                          |                          |             |                          |                          |                          |                          |                          |               |                          |                          |                          |                          |                          |
| h. Indoor swimming pool                                                                                                                     | <input type="checkbox"/>                                                                                                                                                                                                                                                                                                                                                                                                                                                                                                                                                                                                                                                                                                                                                                                                                                                                                                                                                                                                                                                                                                                                                                                                                                                                                                                                                                                                                                                                                                                                                                                                                                                                                                                                                                                                                                                                                                                                                                                                                                                                                                                                                                                                                                                                                                                                                                                                                                                                                                                                                                                                                                                                                                                                                                                                                                                                                                                                                                                                                                                                                                                                                                                                                                                                                                                                                                                                                                                                                                                                                                                                                                                                                                                                                                                                                                                                                                                                                                                                                                                                                                                                                                                                                                                                                                                                                                                                                                                                                                                                                                                    | <input type="checkbox"/> | <input type="checkbox"/>     | <input type="checkbox"/> | <input type="checkbox"/>     |    |            |              |                          |                          |                          |                          |                          |                                                                                                |                          |                          |                          |                          |                          |                                                      |                          |                          |                          |                          |                          |                  |                          |                          |                          |                          |                          |                                                    |                          |                          |                          |                          |                          |                                                                                                                                             |                          |                          |                          |                          |                          |                       |                          |                          |                          |                          |                          |                         |                          |                          |                          |                          |                          |                                                                          |                          |                          |                          |                          |                          |                                                                      |                          |                          |                          |                          |                          |                                                                |                          |                          |                          |                          |                          |                  |                          |                          |                          |                          |                          |                                                                   |                          |                          |                          |                          |                          |                           |                          |                          |                          |                          |                          |                                                             |                          |                          |                          |                          |                          |             |                          |                          |                          |                          |                          |               |                          |                          |                          |                          |                          |
| i. Secure change room lockers available for use during physical activity                                                                    | <input type="checkbox"/>                                                                                                                                                                                                                                                                                                                                                                                                                                                                                                                                                                                                                                                                                                                                                                                                                                                                                                                                                                                                                                                                                                                                                                                                                                                                                                                                                                                                                                                                                                                                                                                                                                                                                                                                                                                                                                                                                                                                                                                                                                                                                                                                                                                                                                                                                                                                                                                                                                                                                                                                                                                                                                                                                                                                                                                                                                                                                                                                                                                                                                                                                                                                                                                                                                                                                                                                                                                                                                                                                                                                                                                                                                                                                                                                                                                                                                                                                                                                                                                                                                                                                                                                                                                                                                                                                                                                                                                                                                                                                                                                                                                    | <input type="checkbox"/> | <input type="checkbox"/>     | <input type="checkbox"/> | <input type="checkbox"/>     |    |            |              |                          |                          |                          |                          |                          |                                                                                                |                          |                          |                          |                          |                          |                                                      |                          |                          |                          |                          |                          |                  |                          |                          |                          |                          |                          |                                                    |                          |                          |                          |                          |                          |                                                                                                                                             |                          |                          |                          |                          |                          |                       |                          |                          |                          |                          |                          |                         |                          |                          |                          |                          |                          |                                                                          |                          |                          |                          |                          |                          |                                                                      |                          |                          |                          |                          |                          |                                                                |                          |                          |                          |                          |                          |                  |                          |                          |                          |                          |                          |                                                                   |                          |                          |                          |                          |                          |                           |                          |                          |                          |                          |                          |                                                             |                          |                          |                          |                          |                          |             |                          |                          |                          |                          |                          |               |                          |                          |                          |                          |                          |
| j. Change rooms available for use before and after physical activity                                                                        | <input type="checkbox"/>                                                                                                                                                                                                                                                                                                                                                                                                                                                                                                                                                                                                                                                                                                                                                                                                                                                                                                                                                                                                                                                                                                                                                                                                                                                                                                                                                                                                                                                                                                                                                                                                                                                                                                                                                                                                                                                                                                                                                                                                                                                                                                                                                                                                                                                                                                                                                                                                                                                                                                                                                                                                                                                                                                                                                                                                                                                                                                                                                                                                                                                                                                                                                                                                                                                                                                                                                                                                                                                                                                                                                                                                                                                                                                                                                                                                                                                                                                                                                                                                                                                                                                                                                                                                                                                                                                                                                                                                                                                                                                                                                                                    | <input type="checkbox"/> | <input type="checkbox"/>     | <input type="checkbox"/> | <input type="checkbox"/>     |    |            |              |                          |                          |                          |                          |                          |                                                                                                |                          |                          |                          |                          |                          |                                                      |                          |                          |                          |                          |                          |                  |                          |                          |                          |                          |                          |                                                    |                          |                          |                          |                          |                          |                                                                                                                                             |                          |                          |                          |                          |                          |                       |                          |                          |                          |                          |                          |                         |                          |                          |                          |                          |                          |                                                                          |                          |                          |                          |                          |                          |                                                                      |                          |                          |                          |                          |                          |                                                                |                          |                          |                          |                          |                          |                  |                          |                          |                          |                          |                          |                                                                   |                          |                          |                          |                          |                          |                           |                          |                          |                          |                          |                          |                                                             |                          |                          |                          |                          |                          |             |                          |                          |                          |                          |                          |               |                          |                          |                          |                          |                          |
| k. Showers available for use before or after physical activity                                                                              | <input type="checkbox"/>                                                                                                                                                                                                                                                                                                                                                                                                                                                                                                                                                                                                                                                                                                                                                                                                                                                                                                                                                                                                                                                                                                                                                                                                                                                                                                                                                                                                                                                                                                                                                                                                                                                                                                                                                                                                                                                                                                                                                                                                                                                                                                                                                                                                                                                                                                                                                                                                                                                                                                                                                                                                                                                                                                                                                                                                                                                                                                                                                                                                                                                                                                                                                                                                                                                                                                                                                                                                                                                                                                                                                                                                                                                                                                                                                                                                                                                                                                                                                                                                                                                                                                                                                                                                                                                                                                                                                                                                                                                                                                                                                                                    | <input type="checkbox"/> | <input type="checkbox"/>     | <input type="checkbox"/> | <input type="checkbox"/>     |    |            |              |                          |                          |                          |                          |                          |                                                                                                |                          |                          |                          |                          |                          |                                                      |                          |                          |                          |                          |                          |                  |                          |                          |                          |                          |                          |                                                    |                          |                          |                          |                          |                          |                                                                                                                                             |                          |                          |                          |                          |                          |                       |                          |                          |                          |                          |                          |                         |                          |                          |                          |                          |                          |                                                                          |                          |                          |                          |                          |                          |                                                                      |                          |                          |                          |                          |                          |                                                                |                          |                          |                          |                          |                          |                  |                          |                          |                          |                          |                          |                                                                   |                          |                          |                          |                          |                          |                           |                          |                          |                          |                          |                          |                                                             |                          |                          |                          |                          |                          |             |                          |                          |                          |                          |                          |               |                          |                          |                          |                          |                          |
| l. Bicycle racks                                                                                                                            | <input type="checkbox"/>                                                                                                                                                                                                                                                                                                                                                                                                                                                                                                                                                                                                                                                                                                                                                                                                                                                                                                                                                                                                                                                                                                                                                                                                                                                                                                                                                                                                                                                                                                                                                                                                                                                                                                                                                                                                                                                                                                                                                                                                                                                                                                                                                                                                                                                                                                                                                                                                                                                                                                                                                                                                                                                                                                                                                                                                                                                                                                                                                                                                                                                                                                                                                                                                                                                                                                                                                                                                                                                                                                                                                                                                                                                                                                                                                                                                                                                                                                                                                                                                                                                                                                                                                                                                                                                                                                                                                                                                                                                                                                                                                                                    | <input type="checkbox"/> | <input type="checkbox"/>     | <input type="checkbox"/> | <input type="checkbox"/>     |    |            |              |                          |                          |                          |                          |                          |                                                                                                |                          |                          |                          |                          |                          |                                                      |                          |                          |                          |                          |                          |                  |                          |                          |                          |                          |                          |                                                    |                          |                          |                          |                          |                          |                                                                                                                                             |                          |                          |                          |                          |                          |                       |                          |                          |                          |                          |                          |                         |                          |                          |                          |                          |                          |                                                                          |                          |                          |                          |                          |                          |                                                                      |                          |                          |                          |                          |                          |                                                                |                          |                          |                          |                          |                          |                  |                          |                          |                          |                          |                          |                                                                   |                          |                          |                          |                          |                          |                           |                          |                          |                          |                          |                          |                                                             |                          |                          |                          |                          |                          |             |                          |                          |                          |                          |                          |               |                          |                          |                          |                          |                          |
| m. <b>If yes</b> , are the racks in a secure area to avoid theft?                                                                           | <input type="checkbox"/>                                                                                                                                                                                                                                                                                                                                                                                                                                                                                                                                                                                                                                                                                                                                                                                                                                                                                                                                                                                                                                                                                                                                                                                                                                                                                                                                                                                                                                                                                                                                                                                                                                                                                                                                                                                                                                                                                                                                                                                                                                                                                                                                                                                                                                                                                                                                                                                                                                                                                                                                                                                                                                                                                                                                                                                                                                                                                                                                                                                                                                                                                                                                                                                                                                                                                                                                                                                                                                                                                                                                                                                                                                                                                                                                                                                                                                                                                                                                                                                                                                                                                                                                                                                                                                                                                                                                                                                                                                                                                                                                                                                    | <input type="checkbox"/> | <input type="checkbox"/>     | <input type="checkbox"/> | <input type="checkbox"/>     |    |            |              |                          |                          |                          |                          |                          |                                                                                                |                          |                          |                          |                          |                          |                                                      |                          |                          |                          |                          |                          |                  |                          |                          |                          |                          |                          |                                                    |                          |                          |                          |                          |                          |                                                                                                                                             |                          |                          |                          |                          |                          |                       |                          |                          |                          |                          |                          |                         |                          |                          |                          |                          |                          |                                                                          |                          |                          |                          |                          |                          |                                                                      |                          |                          |                          |                          |                          |                                                                |                          |                          |                          |                          |                          |                  |                          |                          |                          |                          |                          |                                                                   |                          |                          |                          |                          |                          |                           |                          |                          |                          |                          |                          |                                                             |                          |                          |                          |                          |                          |             |                          |                          |                          |                          |                          |               |                          |                          |                          |                          |                          |
| n. Grassy playground area                                                                                                                   | <input type="checkbox"/>                                                                                                                                                                                                                                                                                                                                                                                                                                                                                                                                                                                                                                                                                                                                                                                                                                                                                                                                                                                                                                                                                                                                                                                                                                                                                                                                                                                                                                                                                                                                                                                                                                                                                                                                                                                                                                                                                                                                                                                                                                                                                                                                                                                                                                                                                                                                                                                                                                                                                                                                                                                                                                                                                                                                                                                                                                                                                                                                                                                                                                                                                                                                                                                                                                                                                                                                                                                                                                                                                                                                                                                                                                                                                                                                                                                                                                                                                                                                                                                                                                                                                                                                                                                                                                                                                                                                                                                                                                                                                                                                                                                    | <input type="checkbox"/> | <input type="checkbox"/>     | <input type="checkbox"/> | <input type="checkbox"/>     |    |            |              |                          |                          |                          |                          |                          |                                                                                                |                          |                          |                          |                          |                          |                                                      |                          |                          |                          |                          |                          |                  |                          |                          |                          |                          |                          |                                                    |                          |                          |                          |                          |                          |                                                                                                                                             |                          |                          |                          |                          |                          |                       |                          |                          |                          |                          |                          |                         |                          |                          |                          |                          |                          |                                                                          |                          |                          |                          |                          |                          |                                                                      |                          |                          |                          |                          |                          |                                                                |                          |                          |                          |                          |                          |                  |                          |                          |                          |                          |                          |                                                                   |                          |                          |                          |                          |                          |                           |                          |                          |                          |                          |                          |                                                             |                          |                          |                          |                          |                          |             |                          |                          |                          |                          |                          |               |                          |                          |                          |                          |                          |
| o. Playground equipment (e.g., climbing structures, swings)                                                                                 | <input type="checkbox"/>                                                                                                                                                                                                                                                                                                                                                                                                                                                                                                                                                                                                                                                                                                                                                                                                                                                                                                                                                                                                                                                                                                                                                                                                                                                                                                                                                                                                                                                                                                                                                                                                                                                                                                                                                                                                                                                                                                                                                                                                                                                                                                                                                                                                                                                                                                                                                                                                                                                                                                                                                                                                                                                                                                                                                                                                                                                                                                                                                                                                                                                                                                                                                                                                                                                                                                                                                                                                                                                                                                                                                                                                                                                                                                                                                                                                                                                                                                                                                                                                                                                                                                                                                                                                                                                                                                                                                                                                                                                                                                                                                                                    | <input type="checkbox"/> | <input type="checkbox"/>     | <input type="checkbox"/> | <input type="checkbox"/>     |    |            |              |                          |                          |                          |                          |                          |                                                                                                |                          |                          |                          |                          |                          |                                                      |                          |                          |                          |                          |                          |                  |                          |                          |                          |                          |                          |                                                    |                          |                          |                          |                          |                          |                                                                                                                                             |                          |                          |                          |                          |                          |                       |                          |                          |                          |                          |                          |                         |                          |                          |                          |                          |                          |                                                                          |                          |                          |                          |                          |                          |                                                                      |                          |                          |                          |                          |                          |                                                                |                          |                          |                          |                          |                          |                  |                          |                          |                          |                          |                          |                                                                   |                          |                          |                          |                          |                          |                           |                          |                          |                          |                          |                          |                                                             |                          |                          |                          |                          |                          |             |                          |                          |                          |                          |                          |               |                          |                          |                          |                          |                          |
| p. Art room                                                                                                                                 | <input type="checkbox"/>                                                                                                                                                                                                                                                                                                                                                                                                                                                                                                                                                                                                                                                                                                                                                                                                                                                                                                                                                                                                                                                                                                                                                                                                                                                                                                                                                                                                                                                                                                                                                                                                                                                                                                                                                                                                                                                                                                                                                                                                                                                                                                                                                                                                                                                                                                                                                                                                                                                                                                                                                                                                                                                                                                                                                                                                                                                                                                                                                                                                                                                                                                                                                                                                                                                                                                                                                                                                                                                                                                                                                                                                                                                                                                                                                                                                                                                                                                                                                                                                                                                                                                                                                                                                                                                                                                                                                                                                                                                                                                                                                                                    | <input type="checkbox"/> | <input type="checkbox"/>     | <input type="checkbox"/> | <input type="checkbox"/>     |    |            |              |                          |                          |                          |                          |                          |                                                                                                |                          |                          |                          |                          |                          |                                                      |                          |                          |                          |                          |                          |                  |                          |                          |                          |                          |                          |                                                    |                          |                          |                          |                          |                          |                                                                                                                                             |                          |                          |                          |                          |                          |                       |                          |                          |                          |                          |                          |                         |                          |                          |                          |                          |                          |                                                                          |                          |                          |                          |                          |                          |                                                                      |                          |                          |                          |                          |                          |                                                                |                          |                          |                          |                          |                          |                  |                          |                          |                          |                          |                          |                                                                   |                          |                          |                          |                          |                          |                           |                          |                          |                          |                          |                          |                                                             |                          |                          |                          |                          |                          |             |                          |                          |                          |                          |                          |               |                          |                          |                          |                          |                          |
| q. Music room                                                                                                                               | <input type="checkbox"/>                                                                                                                                                                                                                                                                                                                                                                                                                                                                                                                                                                                                                                                                                                                                                                                                                                                                                                                                                                                                                                                                                                                                                                                                                                                                                                                                                                                                                                                                                                                                                                                                                                                                                                                                                                                                                                                                                                                                                                                                                                                                                                                                                                                                                                                                                                                                                                                                                                                                                                                                                                                                                                                                                                                                                                                                                                                                                                                                                                                                                                                                                                                                                                                                                                                                                                                                                                                                                                                                                                                                                                                                                                                                                                                                                                                                                                                                                                                                                                                                                                                                                                                                                                                                                                                                                                                                                                                                                                                                                                                                                                                    | <input type="checkbox"/> | <input type="checkbox"/>     | <input type="checkbox"/> | <input type="checkbox"/>     |    |            |              |                          |                          |                          |                          |                          |                                                                                                |                          |                          |                          |                          |                          |                                                      |                          |                          |                          |                          |                          |                  |                          |                          |                          |                          |                          |                                                    |                          |                          |                          |                          |                          |                                                                                                                                             |                          |                          |                          |                          |                          |                       |                          |                          |                          |                          |                          |                         |                          |                          |                          |                          |                          |                                                                          |                          |                          |                          |                          |                          |                                                                      |                          |                          |                          |                          |                          |                                                                |                          |                          |                          |                          |                          |                  |                          |                          |                          |                          |                          |                                                                   |                          |                          |                          |                          |                          |                           |                          |                          |                          |                          |                          |                                                             |                          |                          |                          |                          |                          |             |                          |                          |                          |                          |                          |               |                          |                          |                          |                          |                          |
| Forward                                                                                                                                     | <p><b>21. La care dintre următoarele facilități au acces elevii școlii dumneavoastră în timpul programului de cursuri (inclusiv în timpul orelor de sport)?</b></p> <p>Sală de sport / Alte săli sau spații largi care să permită activitatea fizică (sală de dans, sală de festivități, amfiteatru etc.) / Pistă de alergat / Teren de sport exterior (fotbal, baschet etc.) / Zonă pavată destinată altor activități fizice (șotron, sărit coarda etc.) / Pistă de role / Piscină interioară / Zonă de vestiar securizată utilizabilă pe parcursul activității fizice / Dușuri disponibile înainte și după activitate fizică / Rastel de biciclete într-o zonă care să evite furtul / Zonă acoperită de gazon / Loc de joacă cu echipamente fixe (tobogan, leagăne, masă de ping-pong etc.) / Sală pentru activități artistice (pictură, sculptură etc.) / Sală de muzică;</p> <p>Da / Nu</p>                                                                                                                                                                                                                                                                                                                                                                                                                                                                                                                                                                                                                                                                                                                                                                                                                                                                                                                                                                                                                                                                                                                                                                                                                                                                                                                                                                                                                                                                                                                                                                                                                                                                                                                                                                                                                                                                                                                                                                                                                                                                                                                                                                                                                                                                                                                                                                                                                                                                                                                                                                                                                                                                                                                                                                                                                                                                                                                                                                                                                                                                                                                                                                                                                                                                                                                                                                                                                                                                                                                                                                                                                                                                                                             |                          |                              |                          |                              |    |            |              |                          |                          |                          |                          |                          |                                                                                                |                          |                          |                          |                          |                          |                                                      |                          |                          |                          |                          |                          |                  |                          |                          |                          |                          |                          |                                                    |                          |                          |                          |                          |                          |                                                                                                                                             |                          |                          |                          |                          |                          |                       |                          |                          |                          |                          |                          |                         |                          |                          |                          |                          |                          |                                                                          |                          |                          |                          |                          |                          |                                                                      |                          |                          |                          |                          |                          |                                                                |                          |                          |                          |                          |                          |                  |                          |                          |                          |                          |                          |                                                                   |                          |                          |                          |                          |                          |                           |                          |                          |                          |                          |                          |                                                             |                          |                          |                          |                          |                          |             |                          |                          |                          |                          |                          |               |                          |                          |                          |                          |                          |
| Backward                                                                                                                                    | <p><b>21. Which of the following facilities do your school's students have access to during school hours (including sports classes)?</b></p> <p>Gym / other large halls or spaces that allow physical activity (dance hall, celebration hall, amphitheatre, etc.) / running track / Outdoor Sports Ground (football, basketball, etc.) / paved area for other physical activities (hopscotch, jumping rope, etc.) / roller track / indoor pool /</p>                                                                                                                                                                                                                                                                                                                                                                                                                                                                                                                                                                                                                                                                                                                                                                                                                                                                                                                                                                                                                                                                                                                                                                                                                                                                                                                                                                                                                                                                                                                                                                                                                                                                                                                                                                                                                                                                                                                                                                                                                                                                                                                                                                                                                                                                                                                                                                                                                                                                                                                                                                                                                                                                                                                                                                                                                                                                                                                                                                                                                                                                                                                                                                                                                                                                                                                                                                                                                                                                                                                                                                                                                                                                                                                                                                                                                                                                                                                                                                                                                                                                                                                                                        |                          |                              |                          |                              |    |            |              |                          |                          |                          |                          |                          |                                                                                                |                          |                          |                          |                          |                          |                                                      |                          |                          |                          |                          |                          |                  |                          |                          |                          |                          |                          |                                                    |                          |                          |                          |                          |                          |                                                                                                                                             |                          |                          |                          |                          |                          |                       |                          |                          |                          |                          |                          |                         |                          |                          |                          |                          |                          |                                                                          |                          |                          |                          |                          |                          |                                                                      |                          |                          |                          |                          |                          |                                                                |                          |                          |                          |                          |                          |                  |                          |                          |                          |                          |                          |                                                                   |                          |                          |                          |                          |                          |                           |                          |                          |                          |                          |                          |                                                             |                          |                          |                          |                          |                          |             |                          |                          |                          |                          |                          |               |                          |                          |                          |                          |                          |



|                                                                                      | <p><i>secure locker area to use before and after physical activity / showers available before and after physical activity / bicycle rack in a secure area / lawn covered area / playground with fixed equipment (slide, swings, ping-pong table, etc.) / room for artistic activities (painting, sculpture, etc.) / music room;</i></p> <p>Yes / No</p>                                                                                                                                                                                                                                                                                                                                                                                                                                                                                                                                                                                                                                                                                                                                                                                                                                                        |                          |                          |                          |              |                          |                          |                          |                          |                          |                                                |                          |                          |                                           |                          |                          |                                                                                      |                          |                          |                                                                    |                          |                                  |                          |                          |                          |                          |
|--------------------------------------------------------------------------------------|----------------------------------------------------------------------------------------------------------------------------------------------------------------------------------------------------------------------------------------------------------------------------------------------------------------------------------------------------------------------------------------------------------------------------------------------------------------------------------------------------------------------------------------------------------------------------------------------------------------------------------------------------------------------------------------------------------------------------------------------------------------------------------------------------------------------------------------------------------------------------------------------------------------------------------------------------------------------------------------------------------------------------------------------------------------------------------------------------------------------------------------------------------------------------------------------------------------|--------------------------|--------------------------|--------------------------|--------------|--------------------------|--------------------------|--------------------------|--------------------------|--------------------------|------------------------------------------------|--------------------------|--------------------------|-------------------------------------------|--------------------------|--------------------------|--------------------------------------------------------------------------------------|--------------------------|--------------------------|--------------------------------------------------------------------|--------------------------|----------------------------------|--------------------------|--------------------------|--------------------------|--------------------------|
| Original                                                                             | <p><b>20. Outside of school hours*, does your school permit regular student access to the following?</b><br/> <i>*Outside of school hours means before and/or after school, evenings and weekends. Student access may occur via school-led, community-led or informal use.</i></p> <table border="1"> <thead> <tr> <th></th><th>Yes</th><th>No</th><th>Don't know</th><th>N/A</th></tr> </thead> <tbody> <tr> <td>a. Gymnasium</td><td><input type="checkbox"/></td><td><input type="checkbox"/></td><td><input type="checkbox"/></td><td><input type="checkbox"/></td></tr> <tr> <td>b. Indoor facilities</td><td><input type="checkbox"/></td><td><input type="checkbox"/></td><td><input type="checkbox"/></td><td><input type="checkbox"/></td></tr> <tr> <td>c. Outdoor facilities (e.g., playing fields, paved activity areas, baseball diamond)</td><td><input type="checkbox"/></td><td><input type="checkbox"/></td><td><input type="checkbox"/></td><td><input type="checkbox"/></td></tr> <tr> <td>d. Equipment (e.g., basketballs)</td><td><input type="checkbox"/></td><td><input type="checkbox"/></td><td><input type="checkbox"/></td><td><input type="checkbox"/></td></tr> </tbody> </table> |                          | Yes                      | No                       | Don't know   | N/A                      | a. Gymnasium             | <input type="checkbox"/> | <input type="checkbox"/> | <input type="checkbox"/> | <input type="checkbox"/>                       | b. Indoor facilities     | <input type="checkbox"/> | <input type="checkbox"/>                  | <input type="checkbox"/> | <input type="checkbox"/> | c. Outdoor facilities (e.g., playing fields, paved activity areas, baseball diamond) | <input type="checkbox"/> | <input type="checkbox"/> | <input type="checkbox"/>                                           | <input type="checkbox"/> | d. Equipment (e.g., basketballs) | <input type="checkbox"/> | <input type="checkbox"/> | <input type="checkbox"/> | <input type="checkbox"/> |
|                                                                                      | Yes                                                                                                                                                                                                                                                                                                                                                                                                                                                                                                                                                                                                                                                                                                                                                                                                                                                                                                                                                                                                                                                                                                                                                                                                            | No                       | Don't know               | N/A                      |              |                          |                          |                          |                          |                          |                                                |                          |                          |                                           |                          |                          |                                                                                      |                          |                          |                                                                    |                          |                                  |                          |                          |                          |                          |
| a. Gymnasium                                                                         | <input type="checkbox"/>                                                                                                                                                                                                                                                                                                                                                                                                                                                                                                                                                                                                                                                                                                                                                                                                                                                                                                                                                                                                                                                                                                                                                                                       | <input type="checkbox"/> | <input type="checkbox"/> | <input type="checkbox"/> |              |                          |                          |                          |                          |                          |                                                |                          |                          |                                           |                          |                          |                                                                                      |                          |                          |                                                                    |                          |                                  |                          |                          |                          |                          |
| b. Indoor facilities                                                                 | <input type="checkbox"/>                                                                                                                                                                                                                                                                                                                                                                                                                                                                                                                                                                                                                                                                                                                                                                                                                                                                                                                                                                                                                                                                                                                                                                                       | <input type="checkbox"/> | <input type="checkbox"/> | <input type="checkbox"/> |              |                          |                          |                          |                          |                          |                                                |                          |                          |                                           |                          |                          |                                                                                      |                          |                          |                                                                    |                          |                                  |                          |                          |                          |                          |
| c. Outdoor facilities (e.g., playing fields, paved activity areas, baseball diamond) | <input type="checkbox"/>                                                                                                                                                                                                                                                                                                                                                                                                                                                                                                                                                                                                                                                                                                                                                                                                                                                                                                                                                                                                                                                                                                                                                                                       | <input type="checkbox"/> | <input type="checkbox"/> | <input type="checkbox"/> |              |                          |                          |                          |                          |                          |                                                |                          |                          |                                           |                          |                          |                                                                                      |                          |                          |                                                                    |                          |                                  |                          |                          |                          |                          |
| d. Equipment (e.g., basketballs)                                                     | <input type="checkbox"/>                                                                                                                                                                                                                                                                                                                                                                                                                                                                                                                                                                                                                                                                                                                                                                                                                                                                                                                                                                                                                                                                                                                                                                                       | <input type="checkbox"/> | <input type="checkbox"/> | <input type="checkbox"/> |              |                          |                          |                          |                          |                          |                                                |                          |                          |                                           |                          |                          |                                                                                      |                          |                          |                                                                    |                          |                                  |                          |                          |                          |                          |
| Forward                                                                              | <p>22. La care dintre următoarele facilități ale școlii au acces elevii școlii dumneavoastră <b>în afara orelor de curs</b>?</p> <p><i>Sală de sport / Sălile aflate în interiorul clădirii / Facilități exterioare (ex. teren de baschet etc.) / Echipamente sportive (ex. mingi de baschet, etc.);</i></p> <p>Da/Nu</p>                                                                                                                                                                                                                                                                                                                                                                                                                                                                                                                                                                                                                                                                                                                                                                                                                                                                                      |                          |                          |                          |              |                          |                          |                          |                          |                          |                                                |                          |                          |                                           |                          |                          |                                                                                      |                          |                          |                                                                    |                          |                                  |                          |                          |                          |                          |
| Backward                                                                             | <p>22. Which of the following school facilities do your school's students have access to <b>outside of school hours</b>?</p> <p><i>Gym / halls located inside the building / outdoor facilities (ex. basketball court, etc.) / sports equipment (ex. basketballs, etc.);</i></p> <p>Yes/No</p>                                                                                                                                                                                                                                                                                                                                                                                                                                                                                                                                                                                                                                                                                                                                                                                                                                                                                                                 |                          |                          |                          |              |                          |                          |                          |                          |                          |                                                |                          |                          |                                           |                          |                          |                                                                                      |                          |                          |                                                                    |                          |                                  |                          |                          |                          |                          |
| Original                                                                             | <p><b>21. Outside of school hours*, does your school allow community groups to use the school facilities?</b><br/> <i>*Outside of school hours means before and/or after school, evenings and weekends.</i></p> <p>Yes <input type="checkbox"/> No <input type="checkbox"/> Don't know <input type="checkbox"/></p>                                                                                                                                                                                                                                                                                                                                                                                                                                                                                                                                                                                                                                                                                                                                                                                                                                                                                            |                          |                          |                          |              |                          |                          |                          |                          |                          |                                                |                          |                          |                                           |                          |                          |                                                                                      |                          |                          |                                                                    |                          |                                  |                          |                          |                          |                          |
| Forward                                                                              | <p>23. Permite școala dumneavoastră acces <b>în afara orelor de curs</b> grupurilor organizate pentru utilizarea facilităților școlii destinate activității fizice?</p> <p>Da / Nu</p>                                                                                                                                                                                                                                                                                                                                                                                                                                                                                                                                                                                                                                                                                                                                                                                                                                                                                                                                                                                                                         |                          |                          |                          |              |                          |                          |                          |                          |                          |                                                |                          |                          |                                           |                          |                          |                                                                                      |                          |                          |                                                                    |                          |                                  |                          |                          |                          |                          |
| Backward                                                                             | <p>23. Does your school allow before or after-school access to organized groups for the use of physical activity facilities?</p> <p>Yes / No</p>                                                                                                                                                                                                                                                                                                                                                                                                                                                                                                                                                                                                                                                                                                                                                                                                                                                                                                                                                                                                                                                               |                          |                          |                          |              |                          |                          |                          |                          |                          |                                                |                          |                          |                                           |                          |                          |                                                                                      |                          |                          |                                                                    |                          |                                  |                          |                          |                          |                          |
| Original                                                                             | <p><b>19. Do students have access to the following facilities where they can buy foods or drinks?</b></p> <table border="1"> <thead> <tr> <th></th><th>Yes</th><th>No</th></tr> </thead> <tbody> <tr> <td>a. Cafeteria</td><td><input type="checkbox"/></td><td><input type="checkbox"/></td></tr> <tr> <td>b. School shop</td><td><input type="checkbox"/></td><td><input type="checkbox"/></td></tr> <tr> <td>c. Shops/fast food restaurants close to school</td><td><input type="checkbox"/></td><td><input type="checkbox"/></td></tr> <tr> <td>d. Candy and potato chips vending machine</td><td><input type="checkbox"/></td><td><input type="checkbox"/></td></tr> <tr> <td>e. Drinks vending machine (e.g., coke, soft drinks, orange juice)</td><td><input type="checkbox"/></td><td><input type="checkbox"/></td></tr> <tr> <td>f. Milk vending machine/ milk program (e.g., milk, chocolate milk)</td><td><input type="checkbox"/></td><td><input type="checkbox"/></td></tr> </tbody> </table>                                                                                                                                                                                                     |                          | Yes                      | No                       | a. Cafeteria | <input type="checkbox"/> | <input type="checkbox"/> | b. School shop           | <input type="checkbox"/> | <input type="checkbox"/> | c. Shops/fast food restaurants close to school | <input type="checkbox"/> | <input type="checkbox"/> | d. Candy and potato chips vending machine | <input type="checkbox"/> | <input type="checkbox"/> | e. Drinks vending machine (e.g., coke, soft drinks, orange juice)                    | <input type="checkbox"/> | <input type="checkbox"/> | f. Milk vending machine/ milk program (e.g., milk, chocolate milk) | <input type="checkbox"/> | <input type="checkbox"/>         |                          |                          |                          |                          |
|                                                                                      | Yes                                                                                                                                                                                                                                                                                                                                                                                                                                                                                                                                                                                                                                                                                                                                                                                                                                                                                                                                                                                                                                                                                                                                                                                                            | No                       |                          |                          |              |                          |                          |                          |                          |                          |                                                |                          |                          |                                           |                          |                          |                                                                                      |                          |                          |                                                                    |                          |                                  |                          |                          |                          |                          |
| a. Cafeteria                                                                         | <input type="checkbox"/>                                                                                                                                                                                                                                                                                                                                                                                                                                                                                                                                                                                                                                                                                                                                                                                                                                                                                                                                                                                                                                                                                                                                                                                       | <input type="checkbox"/> |                          |                          |              |                          |                          |                          |                          |                          |                                                |                          |                          |                                           |                          |                          |                                                                                      |                          |                          |                                                                    |                          |                                  |                          |                          |                          |                          |
| b. School shop                                                                       | <input type="checkbox"/>                                                                                                                                                                                                                                                                                                                                                                                                                                                                                                                                                                                                                                                                                                                                                                                                                                                                                                                                                                                                                                                                                                                                                                                       | <input type="checkbox"/> |                          |                          |              |                          |                          |                          |                          |                          |                                                |                          |                          |                                           |                          |                          |                                                                                      |                          |                          |                                                                    |                          |                                  |                          |                          |                          |                          |
| c. Shops/fast food restaurants close to school                                       | <input type="checkbox"/>                                                                                                                                                                                                                                                                                                                                                                                                                                                                                                                                                                                                                                                                                                                                                                                                                                                                                                                                                                                                                                                                                                                                                                                       | <input type="checkbox"/> |                          |                          |              |                          |                          |                          |                          |                          |                                                |                          |                          |                                           |                          |                          |                                                                                      |                          |                          |                                                                    |                          |                                  |                          |                          |                          |                          |
| d. Candy and potato chips vending machine                                            | <input type="checkbox"/>                                                                                                                                                                                                                                                                                                                                                                                                                                                                                                                                                                                                                                                                                                                                                                                                                                                                                                                                                                                                                                                                                                                                                                                       | <input type="checkbox"/> |                          |                          |              |                          |                          |                          |                          |                          |                                                |                          |                          |                                           |                          |                          |                                                                                      |                          |                          |                                                                    |                          |                                  |                          |                          |                          |                          |
| e. Drinks vending machine (e.g., coke, soft drinks, orange juice)                    | <input type="checkbox"/>                                                                                                                                                                                                                                                                                                                                                                                                                                                                                                                                                                                                                                                                                                                                                                                                                                                                                                                                                                                                                                                                                                                                                                                       | <input type="checkbox"/> |                          |                          |              |                          |                          |                          |                          |                          |                                                |                          |                          |                                           |                          |                          |                                                                                      |                          |                          |                                                                    |                          |                                  |                          |                          |                          |                          |
| f. Milk vending machine/ milk program (e.g., milk, chocolate milk)                   | <input type="checkbox"/>                                                                                                                                                                                                                                                                                                                                                                                                                                                                                                                                                                                                                                                                                                                                                                                                                                                                                                                                                                                                                                                                                                                                                                                       | <input type="checkbox"/> |                          |                          |              |                          |                          |                          |                          |                          |                                                |                          |                          |                                           |                          |                          |                                                                                      |                          |                          |                                                                    |                          |                                  |                          |                          |                          |                          |

| Forward                                                                      | <p>24. La care dintre următoarele facilități au acces elevii școlii dumneavoastră pentru procurarea de alimente?</p> <p><i>Cantină / Magazin în interiorul școlii / Magazine în proximitatea școlii / Restaurante fast-food în proximitatea școlii / Aparate/tonomate cu dulciuri sau chips-uri din cartofi sau alte gustări / Aparate/tonomate cu băuturi / Program de tip „Laptele și cornul” - doar la clasele la care se aplică;</i></p> <p><i>Da/Nu</i></p>                                                                                                                                                                                                                                                                                                                                                                                                                                                                                                                                                    |                                   |                               |                                   |                               |                                                          |                          |                          |                          |                                                         |                          |                          |                          |                                  |                          |                          |                          |                                                                              |                          |                          |                          |
|------------------------------------------------------------------------------|---------------------------------------------------------------------------------------------------------------------------------------------------------------------------------------------------------------------------------------------------------------------------------------------------------------------------------------------------------------------------------------------------------------------------------------------------------------------------------------------------------------------------------------------------------------------------------------------------------------------------------------------------------------------------------------------------------------------------------------------------------------------------------------------------------------------------------------------------------------------------------------------------------------------------------------------------------------------------------------------------------------------|-----------------------------------|-------------------------------|-----------------------------------|-------------------------------|----------------------------------------------------------|--------------------------|--------------------------|--------------------------|---------------------------------------------------------|--------------------------|--------------------------|--------------------------|----------------------------------|--------------------------|--------------------------|--------------------------|------------------------------------------------------------------------------|--------------------------|--------------------------|--------------------------|
| Backward                                                                     | <p>24. Which of the following facilities do your school's students have access to for food procurement?</p> <p><i>Cafeteria / shop inside the school / shops near the school / fast food restaurants near the school / vending machines with sweets or potato chips or other snacks / vending machines with drinks / Program such as milk and breadstick” - only for the grades to which it applies;</i></p> <p><i>Yes/No</i></p>                                                                                                                                                                                                                                                                                                                                                                                                                                                                                                                                                                                   |                                   |                               |                                   |                               |                                                          |                          |                          |                          |                                                         |                          |                          |                          |                                  |                          |                          |                          |                                                                              |                          |                          |                          |
| Original                                                                     | <b>E. HEALTHY EATING</b>                                                                                                                                                                                                                                                                                                                                                                                                                                                                                                                                                                                                                                                                                                                                                                                                                                                                                                                                                                                            |                                   |                               |                                   |                               |                                                          |                          |                          |                          |                                                         |                          |                          |                          |                                  |                          |                          |                          |                                                                              |                          |                          |                          |
| Forward                                                                      | <b>E. Alimentația sănătoasă</b>                                                                                                                                                                                                                                                                                                                                                                                                                                                                                                                                                                                                                                                                                                                                                                                                                                                                                                                                                                                     |                                   |                               |                                   |                               |                                                          |                          |                          |                          |                                                         |                          |                          |                          |                                  |                          |                          |                          |                                                                              |                          |                          |                          |
| Backward                                                                     | <b>E. Healthy Eating</b>                                                                                                                                                                                                                                                                                                                                                                                                                                                                                                                                                                                                                                                                                                                                                                                                                                                                                                                                                                                            |                                   |                               |                                   |                               |                                                          |                          |                          |                          |                                                         |                          |                          |                          |                                  |                          |                          |                          |                                                                              |                          |                          |                          |
| Original                                                                     | <p><b>22. Does your school provide any of the following to promote the sale of healthy food? (Check all that apply)</b></p> <table><thead><tr><th></th><th><i>Cafeteria</i></th><th><i>Snack bar/<br/>School shop</i></th><th><i>Vending<br/>machine(s)</i></th></tr></thead><tbody><tr><td>a. Healthy food choices at a reasonable/subsidized price</td><td><input type="checkbox"/></td><td><input type="checkbox"/></td><td><input type="checkbox"/></td></tr><tr><td>b. Healthy eating promotional materials (e.g., posters)</td><td><input type="checkbox"/></td><td><input type="checkbox"/></td><td><input type="checkbox"/></td></tr><tr><td>c. Daily healthy eating specials</td><td><input type="checkbox"/></td><td><input type="checkbox"/></td><td><input type="checkbox"/></td></tr><tr><td>d. Healthy eating cafeteria program (e.g., Eat Smart or independent program)</td><td><input type="checkbox"/></td><td><input type="checkbox"/></td><td><input type="checkbox"/></td></tr></tbody></table> |                                   | <i>Cafeteria</i>              | <i>Snack bar/<br/>School shop</i> | <i>Vending<br/>machine(s)</i> | a. Healthy food choices at a reasonable/subsidized price | <input type="checkbox"/> | <input type="checkbox"/> | <input type="checkbox"/> | b. Healthy eating promotional materials (e.g., posters) | <input type="checkbox"/> | <input type="checkbox"/> | <input type="checkbox"/> | c. Daily healthy eating specials | <input type="checkbox"/> | <input type="checkbox"/> | <input type="checkbox"/> | d. Healthy eating cafeteria program (e.g., Eat Smart or independent program) | <input type="checkbox"/> | <input type="checkbox"/> | <input type="checkbox"/> |
|                                                                              | <i>Cafeteria</i>                                                                                                                                                                                                                                                                                                                                                                                                                                                                                                                                                                                                                                                                                                                                                                                                                                                                                                                                                                                                    | <i>Snack bar/<br/>School shop</i> | <i>Vending<br/>machine(s)</i> |                                   |                               |                                                          |                          |                          |                          |                                                         |                          |                          |                          |                                  |                          |                          |                          |                                                                              |                          |                          |                          |
| a. Healthy food choices at a reasonable/subsidized price                     | <input type="checkbox"/>                                                                                                                                                                                                                                                                                                                                                                                                                                                                                                                                                                                                                                                                                                                                                                                                                                                                                                                                                                                            | <input type="checkbox"/>          | <input type="checkbox"/>      |                                   |                               |                                                          |                          |                          |                          |                                                         |                          |                          |                          |                                  |                          |                          |                          |                                                                              |                          |                          |                          |
| b. Healthy eating promotional materials (e.g., posters)                      | <input type="checkbox"/>                                                                                                                                                                                                                                                                                                                                                                                                                                                                                                                                                                                                                                                                                                                                                                                                                                                                                                                                                                                            | <input type="checkbox"/>          | <input type="checkbox"/>      |                                   |                               |                                                          |                          |                          |                          |                                                         |                          |                          |                          |                                  |                          |                          |                          |                                                                              |                          |                          |                          |
| c. Daily healthy eating specials                                             | <input type="checkbox"/>                                                                                                                                                                                                                                                                                                                                                                                                                                                                                                                                                                                                                                                                                                                                                                                                                                                                                                                                                                                            | <input type="checkbox"/>          | <input type="checkbox"/>      |                                   |                               |                                                          |                          |                          |                          |                                                         |                          |                          |                          |                                  |                          |                          |                          |                                                                              |                          |                          |                          |
| d. Healthy eating cafeteria program (e.g., Eat Smart or independent program) | <input type="checkbox"/>                                                                                                                                                                                                                                                                                                                                                                                                                                                                                                                                                                                                                                                                                                                                                                                                                                                                                                                                                                                            | <input type="checkbox"/>          | <input type="checkbox"/>      |                                   |                               |                                                          |                          |                          |                          |                                                         |                          |                          |                          |                                  |                          |                          |                          |                                                                              |                          |                          |                          |
| Adapted                                                                      | <i>(removed)</i>                                                                                                                                                                                                                                                                                                                                                                                                                                                                                                                                                                                                                                                                                                                                                                                                                                                                                                                                                                                                    |                                   |                               |                                   |                               |                                                          |                          |                          |                          |                                                         |                          |                          |                          |                                  |                          |                          |                          |                                                                              |                          |                          |                          |
| Original                                                                     | <p><b>23. Does your school ensure that all students, regardless of ability to pay, have access to fruits and vegetables?</b></p> <p><input type="checkbox"/> Yes, entire school year</p> <p><input type="checkbox"/> Yes, occasional/short term</p> <p><input type="checkbox"/> No</p>                                                                                                                                                                                                                                                                                                                                                                                                                                                                                                                                                                                                                                                                                                                              |                                   |                               |                                   |                               |                                                          |                          |                          |                          |                                                         |                          |                          |                          |                                  |                          |                          |                          |                                                                              |                          |                          |                          |
| Adapted                                                                      | <i>(removed)</i>                                                                                                                                                                                                                                                                                                                                                                                                                                                                                                                                                                                                                                                                                                                                                                                                                                                                                                                                                                                                    |                                   |                               |                                   |                               |                                                          |                          |                          |                          |                                                         |                          |                          |                          |                                  |                          |                          |                          |                                                                              |                          |                          |                          |
| Original                                                                     | <p><b>24. Does your school offer any of the following? (Check all that apply)</b></p> <p><input type="checkbox"/> Cooking classes</p> <p><input type="checkbox"/> Gardening (e.g., growing produce)</p> <p><input type="checkbox"/> Field trips to farms/farmers' markets</p> <p><input type="checkbox"/> Media literacy on special topics related to healthy eating (e.g., body image, eating disorders)</p> <p><input type="checkbox"/> Field trips to the local grocery store</p>                                                                                                                                                                                                                                                                                                                                                                                                                                                                                                                                |                                   |                               |                                   |                               |                                                          |                          |                          |                          |                                                         |                          |                          |                          |                                  |                          |                          |                          |                                                                              |                          |                          |                          |
| Forward                                                                      | <p>25. Sunt disponibile vreuna dintre următoarele în școala dumneavoastră? Marcați toate răspunsurile care corespund.</p> <p><i>Cursuri de gătit / Activități de cultivare a legumelor și fructelor / Excursii la producători locali de alimente / Informații scrise privind alimentația sănătoasă</i></p>                                                                                                                                                                                                                                                                                                                                                                                                                                                                                                                                                                                                                                                                                                          |                                   |                               |                                   |                               |                                                          |                          |                          |                          |                                                         |                          |                          |                          |                                  |                          |                          |                          |                                                                              |                          |                          |                          |
| Backward                                                                     | <p>25. Are any of the following available in your school? Mark all the answers that correspond.</p> <p><i>Cooking classes / vegetable and fruit growing / trips to local food producers / written information on healthy eating</i></p>                                                                                                                                                                                                                                                                                                                                                                                                                                                                                                                                                                                                                                                                                                                                                                             |                                   |                               |                                   |                               |                                                          |                          |                          |                          |                                                         |                          |                          |                          |                                  |                          |                          |                          |                                                                              |                          |                          |                          |

| Original                                                                            | <p><b>25. During the past 12 months, did your school initiate/continue any of the following activities/programs at your school?</b></p> <table border="1"> <thead> <tr> <th></th><th>Yes</th><th>No</th><th>N/A</th></tr> </thead> <tbody> <tr> <td>a. Offered healthy food choices during breakfast program</td><td><input type="checkbox"/></td><td><input type="checkbox"/></td><td><input type="checkbox"/></td></tr> <tr> <td>b. Offered healthy food choices during lunch program</td><td><input type="checkbox"/></td><td><input type="checkbox"/></td><td><input type="checkbox"/></td></tr> <tr> <td>c. Offered healthy food choices in the cafeteria(s)</td><td><input type="checkbox"/></td><td><input type="checkbox"/></td><td><input type="checkbox"/></td></tr> <tr> <td>d. Offered healthy food choices in the snack bar/school shop(s)</td><td><input type="checkbox"/></td><td><input type="checkbox"/></td><td><input type="checkbox"/></td></tr> <tr> <td>e. Offered healthy food choices in the vending machine(s)</td><td><input type="checkbox"/></td><td><input type="checkbox"/></td><td><input type="checkbox"/></td></tr> <tr> <td>f. Organized Nutrition Month activities</td><td><input type="checkbox"/></td><td><input type="checkbox"/></td><td><input type="checkbox"/></td></tr> <tr> <td>g. Stopped the sale of junk food</td><td><input type="checkbox"/></td><td><input type="checkbox"/></td><td><input type="checkbox"/></td></tr> <tr> <td>h. Held junk food free days</td><td><input type="checkbox"/></td><td><input type="checkbox"/></td><td><input type="checkbox"/></td></tr> <tr> <td>i. Stopped the sale of sugar-sweetened beverages</td><td><input type="checkbox"/></td><td><input type="checkbox"/></td><td><input type="checkbox"/></td></tr> </tbody> </table> |                          | Yes                      | No | N/A | a. Offered healthy food choices during breakfast program | <input type="checkbox"/> | <input type="checkbox"/> | <input type="checkbox"/> | b. Offered healthy food choices during lunch program | <input type="checkbox"/> | <input type="checkbox"/> | <input type="checkbox"/> | c. Offered healthy food choices in the cafeteria(s) | <input type="checkbox"/> | <input type="checkbox"/> | <input type="checkbox"/> | d. Offered healthy food choices in the snack bar/school shop(s) | <input type="checkbox"/> | <input type="checkbox"/> | <input type="checkbox"/> | e. Offered healthy food choices in the vending machine(s) | <input type="checkbox"/> | <input type="checkbox"/> | <input type="checkbox"/> | f. Organized Nutrition Month activities                                             | <input type="checkbox"/> | <input type="checkbox"/> | <input type="checkbox"/> | g. Stopped the sale of junk food | <input type="checkbox"/> | <input type="checkbox"/> | <input type="checkbox"/> | h. Held junk food free days            | <input type="checkbox"/> | <input type="checkbox"/> | <input type="checkbox"/> | i. Stopped the sale of sugar-sweetened beverages                            | <input type="checkbox"/> | <input type="checkbox"/> | <input type="checkbox"/> |
|-------------------------------------------------------------------------------------|----------------------------------------------------------------------------------------------------------------------------------------------------------------------------------------------------------------------------------------------------------------------------------------------------------------------------------------------------------------------------------------------------------------------------------------------------------------------------------------------------------------------------------------------------------------------------------------------------------------------------------------------------------------------------------------------------------------------------------------------------------------------------------------------------------------------------------------------------------------------------------------------------------------------------------------------------------------------------------------------------------------------------------------------------------------------------------------------------------------------------------------------------------------------------------------------------------------------------------------------------------------------------------------------------------------------------------------------------------------------------------------------------------------------------------------------------------------------------------------------------------------------------------------------------------------------------------------------------------------------------------------------------------------------------------------------------------------------------------------------------------------------------------------------------------------------|--------------------------|--------------------------|----|-----|----------------------------------------------------------|--------------------------|--------------------------|--------------------------|------------------------------------------------------|--------------------------|--------------------------|--------------------------|-----------------------------------------------------|--------------------------|--------------------------|--------------------------|-----------------------------------------------------------------|--------------------------|--------------------------|--------------------------|-----------------------------------------------------------|--------------------------|--------------------------|--------------------------|-------------------------------------------------------------------------------------|--------------------------|--------------------------|--------------------------|----------------------------------|--------------------------|--------------------------|--------------------------|----------------------------------------|--------------------------|--------------------------|--------------------------|-----------------------------------------------------------------------------|--------------------------|--------------------------|--------------------------|
|                                                                                     | Yes                                                                                                                                                                                                                                                                                                                                                                                                                                                                                                                                                                                                                                                                                                                                                                                                                                                                                                                                                                                                                                                                                                                                                                                                                                                                                                                                                                                                                                                                                                                                                                                                                                                                                                                                                                                                                  | No                       | N/A                      |    |     |                                                          |                          |                          |                          |                                                      |                          |                          |                          |                                                     |                          |                          |                          |                                                                 |                          |                          |                          |                                                           |                          |                          |                          |                                                                                     |                          |                          |                          |                                  |                          |                          |                          |                                        |                          |                          |                          |                                                                             |                          |                          |                          |
| a. Offered healthy food choices during breakfast program                            | <input type="checkbox"/>                                                                                                                                                                                                                                                                                                                                                                                                                                                                                                                                                                                                                                                                                                                                                                                                                                                                                                                                                                                                                                                                                                                                                                                                                                                                                                                                                                                                                                                                                                                                                                                                                                                                                                                                                                                             | <input type="checkbox"/> | <input type="checkbox"/> |    |     |                                                          |                          |                          |                          |                                                      |                          |                          |                          |                                                     |                          |                          |                          |                                                                 |                          |                          |                          |                                                           |                          |                          |                          |                                                                                     |                          |                          |                          |                                  |                          |                          |                          |                                        |                          |                          |                          |                                                                             |                          |                          |                          |
| b. Offered healthy food choices during lunch program                                | <input type="checkbox"/>                                                                                                                                                                                                                                                                                                                                                                                                                                                                                                                                                                                                                                                                                                                                                                                                                                                                                                                                                                                                                                                                                                                                                                                                                                                                                                                                                                                                                                                                                                                                                                                                                                                                                                                                                                                             | <input type="checkbox"/> | <input type="checkbox"/> |    |     |                                                          |                          |                          |                          |                                                      |                          |                          |                          |                                                     |                          |                          |                          |                                                                 |                          |                          |                          |                                                           |                          |                          |                          |                                                                                     |                          |                          |                          |                                  |                          |                          |                          |                                        |                          |                          |                          |                                                                             |                          |                          |                          |
| c. Offered healthy food choices in the cafeteria(s)                                 | <input type="checkbox"/>                                                                                                                                                                                                                                                                                                                                                                                                                                                                                                                                                                                                                                                                                                                                                                                                                                                                                                                                                                                                                                                                                                                                                                                                                                                                                                                                                                                                                                                                                                                                                                                                                                                                                                                                                                                             | <input type="checkbox"/> | <input type="checkbox"/> |    |     |                                                          |                          |                          |                          |                                                      |                          |                          |                          |                                                     |                          |                          |                          |                                                                 |                          |                          |                          |                                                           |                          |                          |                          |                                                                                     |                          |                          |                          |                                  |                          |                          |                          |                                        |                          |                          |                          |                                                                             |                          |                          |                          |
| d. Offered healthy food choices in the snack bar/school shop(s)                     | <input type="checkbox"/>                                                                                                                                                                                                                                                                                                                                                                                                                                                                                                                                                                                                                                                                                                                                                                                                                                                                                                                                                                                                                                                                                                                                                                                                                                                                                                                                                                                                                                                                                                                                                                                                                                                                                                                                                                                             | <input type="checkbox"/> | <input type="checkbox"/> |    |     |                                                          |                          |                          |                          |                                                      |                          |                          |                          |                                                     |                          |                          |                          |                                                                 |                          |                          |                          |                                                           |                          |                          |                          |                                                                                     |                          |                          |                          |                                  |                          |                          |                          |                                        |                          |                          |                          |                                                                             |                          |                          |                          |
| e. Offered healthy food choices in the vending machine(s)                           | <input type="checkbox"/>                                                                                                                                                                                                                                                                                                                                                                                                                                                                                                                                                                                                                                                                                                                                                                                                                                                                                                                                                                                                                                                                                                                                                                                                                                                                                                                                                                                                                                                                                                                                                                                                                                                                                                                                                                                             | <input type="checkbox"/> | <input type="checkbox"/> |    |     |                                                          |                          |                          |                          |                                                      |                          |                          |                          |                                                     |                          |                          |                          |                                                                 |                          |                          |                          |                                                           |                          |                          |                          |                                                                                     |                          |                          |                          |                                  |                          |                          |                          |                                        |                          |                          |                          |                                                                             |                          |                          |                          |
| f. Organized Nutrition Month activities                                             | <input type="checkbox"/>                                                                                                                                                                                                                                                                                                                                                                                                                                                                                                                                                                                                                                                                                                                                                                                                                                                                                                                                                                                                                                                                                                                                                                                                                                                                                                                                                                                                                                                                                                                                                                                                                                                                                                                                                                                             | <input type="checkbox"/> | <input type="checkbox"/> |    |     |                                                          |                          |                          |                          |                                                      |                          |                          |                          |                                                     |                          |                          |                          |                                                                 |                          |                          |                          |                                                           |                          |                          |                          |                                                                                     |                          |                          |                          |                                  |                          |                          |                          |                                        |                          |                          |                          |                                                                             |                          |                          |                          |
| g. Stopped the sale of junk food                                                    | <input type="checkbox"/>                                                                                                                                                                                                                                                                                                                                                                                                                                                                                                                                                                                                                                                                                                                                                                                                                                                                                                                                                                                                                                                                                                                                                                                                                                                                                                                                                                                                                                                                                                                                                                                                                                                                                                                                                                                             | <input type="checkbox"/> | <input type="checkbox"/> |    |     |                                                          |                          |                          |                          |                                                      |                          |                          |                          |                                                     |                          |                          |                          |                                                                 |                          |                          |                          |                                                           |                          |                          |                          |                                                                                     |                          |                          |                          |                                  |                          |                          |                          |                                        |                          |                          |                          |                                                                             |                          |                          |                          |
| h. Held junk food free days                                                         | <input type="checkbox"/>                                                                                                                                                                                                                                                                                                                                                                                                                                                                                                                                                                                                                                                                                                                                                                                                                                                                                                                                                                                                                                                                                                                                                                                                                                                                                                                                                                                                                                                                                                                                                                                                                                                                                                                                                                                             | <input type="checkbox"/> | <input type="checkbox"/> |    |     |                                                          |                          |                          |                          |                                                      |                          |                          |                          |                                                     |                          |                          |                          |                                                                 |                          |                          |                          |                                                           |                          |                          |                          |                                                                                     |                          |                          |                          |                                  |                          |                          |                          |                                        |                          |                          |                          |                                                                             |                          |                          |                          |
| i. Stopped the sale of sugar-sweetened beverages                                    | <input type="checkbox"/>                                                                                                                                                                                                                                                                                                                                                                                                                                                                                                                                                                                                                                                                                                                                                                                                                                                                                                                                                                                                                                                                                                                                                                                                                                                                                                                                                                                                                                                                                                                                                                                                                                                                                                                                                                                             | <input type="checkbox"/> | <input type="checkbox"/> |    |     |                                                          |                          |                          |                          |                                                      |                          |                          |                          |                                                     |                          |                          |                          |                                                                 |                          |                          |                          |                                                           |                          |                          |                          |                                                                                     |                          |                          |                          |                                  |                          |                          |                          |                                        |                          |                          |                          |                                                                             |                          |                          |                          |
| Forward                                                                             | <p>26. Pe parcursul <b>ultimelor 12 luni</b> a organizat școala dumnevoastră vreuna dintre următoarele activități?</p> <p><i>Oferit variante alimentare sănătoase la cantina / Oferit variante alimentare sănătoase la magazinul școlii / Oferit variante alimentare sănătoase la aparatele/tonomatele de alimente sau băuturi / Organizat activități cu scop informativ pentru nutriția sănătoasă / Organizat de activități tip „ziua fără băuturi îndulcite”</i></p> <p><i>Nu se aplică / Da / Nu</i></p>                                                                                                                                                                                                                                                                                                                                                                                                                                                                                                                                                                                                                                                                                                                                                                                                                                                                                                                                                                                                                                                                                                                                                                                                                                                                                                          |                          |                          |    |     |                                                          |                          |                          |                          |                                                      |                          |                          |                          |                                                     |                          |                          |                          |                                                                 |                          |                          |                          |                                                           |                          |                          |                          |                                                                                     |                          |                          |                          |                                  |                          |                          |                          |                                        |                          |                          |                          |                                                                             |                          |                          |                          |
| Backward                                                                            | <p>26. During the <b>last 12 months</b>, has your school organized any of the following activities?</p> <p><i>Offered healthy food options at the cafeteria / offered healthy food options at the school store / offered healthy food options at the food or beverage vending machines / organized informative activities for Healthy Nutrition / organized activities such as "day without sweetened drinks"</i></p> <p><i>Not applicable / Yes / No</i></p>                                                                                                                                                                                                                                                                                                                                                                                                                                                                                                                                                                                                                                                                                                                                                                                                                                                                                                                                                                                                                                                                                                                                                                                                                                                                                                                                                        |                          |                          |    |     |                                                          |                          |                          |                          |                                                      |                          |                          |                          |                                                     |                          |                          |                          |                                                                 |                          |                          |                          |                                                           |                          |                          |                          |                                                                                     |                          |                          |                          |                                  |                          |                          |                          |                                        |                          |                          |                          |                                                                             |                          |                          |                          |
| Original                                                                            | <b>F. NEIGHBORHOOD/COMMUNITY</b>                                                                                                                                                                                                                                                                                                                                                                                                                                                                                                                                                                                                                                                                                                                                                                                                                                                                                                                                                                                                                                                                                                                                                                                                                                                                                                                                                                                                                                                                                                                                                                                                                                                                                                                                                                                     |                          |                          |    |     |                                                          |                          |                          |                          |                                                      |                          |                          |                          |                                                     |                          |                          |                          |                                                                 |                          |                          |                          |                                                           |                          |                          |                          |                                                                                     |                          |                          |                          |                                  |                          |                          |                          |                                        |                          |                          |                          |                                                                             |                          |                          |                          |
| Forward                                                                             | <b>F. Împrejurimile școlii</b>                                                                                                                                                                                                                                                                                                                                                                                                                                                                                                                                                                                                                                                                                                                                                                                                                                                                                                                                                                                                                                                                                                                                                                                                                                                                                                                                                                                                                                                                                                                                                                                                                                                                                                                                                                                       |                          |                          |    |     |                                                          |                          |                          |                          |                                                      |                          |                          |                          |                                                     |                          |                          |                          |                                                                 |                          |                          |                          |                                                           |                          |                          |                          |                                                                                     |                          |                          |                          |                                  |                          |                          |                          |                                        |                          |                          |                          |                                                                             |                          |                          |                          |
| Backward                                                                            | <b>F. School Surroundings</b>                                                                                                                                                                                                                                                                                                                                                                                                                                                                                                                                                                                                                                                                                                                                                                                                                                                                                                                                                                                                                                                                                                                                                                                                                                                                                                                                                                                                                                                                                                                                                                                                                                                                                                                                                                                        |                          |                          |    |     |                                                          |                          |                          |                          |                                                      |                          |                          |                          |                                                     |                          |                          |                          |                                                                 |                          |                          |                          |                                                           |                          |                          |                          |                                                                                     |                          |                          |                          |                                  |                          |                          |                          |                                        |                          |                          |                          |                                                                             |                          |                          |                          |
| Original                                                                            | <p><b>26. During the past 12 months, have any of the following items been sold as part of fundraising for any school organization?</b></p> <table border="1"> <thead> <tr> <th></th><th>Yes</th><th>No</th><th>N/A</th></tr> </thead> <tbody> <tr> <td>a. Chocolate candy</td><td><input type="checkbox"/></td><td><input type="checkbox"/></td><td><input type="checkbox"/></td></tr> <tr> <td>b. Other candy</td><td><input type="checkbox"/></td><td><input type="checkbox"/></td><td><input type="checkbox"/></td></tr> <tr> <td>c. Other junk food (e.g., popcorn)</td><td><input type="checkbox"/></td><td><input type="checkbox"/></td><td><input type="checkbox"/></td></tr> <tr> <td>d. Soda pop or fruit drinks that are not 100% juice</td><td><input type="checkbox"/></td><td><input type="checkbox"/></td><td><input type="checkbox"/></td></tr> <tr> <td>e. Sports drinks</td><td><input type="checkbox"/></td><td><input type="checkbox"/></td><td><input type="checkbox"/></td></tr> <tr> <td>f. Cookies, crackers, cakes, pastries, or other baked goods that are not low in fat</td><td><input type="checkbox"/></td><td><input type="checkbox"/></td><td><input type="checkbox"/></td></tr> <tr> <td>g. Fruits or vegetables</td><td><input type="checkbox"/></td><td><input type="checkbox"/></td><td><input type="checkbox"/></td></tr> <tr> <td>h. 100% fruit juice or vegetable juice</td><td><input type="checkbox"/></td><td><input type="checkbox"/></td><td><input type="checkbox"/></td></tr> <tr> <td>i. Low-fat cookies, crackers, cakes, pastries, or other low-fat baked goods</td><td><input type="checkbox"/></td><td><input type="checkbox"/></td><td><input type="checkbox"/></td></tr> </tbody> </table>                                                                       |                          | Yes                      | No | N/A | a. Chocolate candy                                       | <input type="checkbox"/> | <input type="checkbox"/> | <input type="checkbox"/> | b. Other candy                                       | <input type="checkbox"/> | <input type="checkbox"/> | <input type="checkbox"/> | c. Other junk food (e.g., popcorn)                  | <input type="checkbox"/> | <input type="checkbox"/> | <input type="checkbox"/> | d. Soda pop or fruit drinks that are not 100% juice             | <input type="checkbox"/> | <input type="checkbox"/> | <input type="checkbox"/> | e. Sports drinks                                          | <input type="checkbox"/> | <input type="checkbox"/> | <input type="checkbox"/> | f. Cookies, crackers, cakes, pastries, or other baked goods that are not low in fat | <input type="checkbox"/> | <input type="checkbox"/> | <input type="checkbox"/> | g. Fruits or vegetables          | <input type="checkbox"/> | <input type="checkbox"/> | <input type="checkbox"/> | h. 100% fruit juice or vegetable juice | <input type="checkbox"/> | <input type="checkbox"/> | <input type="checkbox"/> | i. Low-fat cookies, crackers, cakes, pastries, or other low-fat baked goods | <input type="checkbox"/> | <input type="checkbox"/> | <input type="checkbox"/> |
|                                                                                     | Yes                                                                                                                                                                                                                                                                                                                                                                                                                                                                                                                                                                                                                                                                                                                                                                                                                                                                                                                                                                                                                                                                                                                                                                                                                                                                                                                                                                                                                                                                                                                                                                                                                                                                                                                                                                                                                  | No                       | N/A                      |    |     |                                                          |                          |                          |                          |                                                      |                          |                          |                          |                                                     |                          |                          |                          |                                                                 |                          |                          |                          |                                                           |                          |                          |                          |                                                                                     |                          |                          |                          |                                  |                          |                          |                          |                                        |                          |                          |                          |                                                                             |                          |                          |                          |
| a. Chocolate candy                                                                  | <input type="checkbox"/>                                                                                                                                                                                                                                                                                                                                                                                                                                                                                                                                                                                                                                                                                                                                                                                                                                                                                                                                                                                                                                                                                                                                                                                                                                                                                                                                                                                                                                                                                                                                                                                                                                                                                                                                                                                             | <input type="checkbox"/> | <input type="checkbox"/> |    |     |                                                          |                          |                          |                          |                                                      |                          |                          |                          |                                                     |                          |                          |                          |                                                                 |                          |                          |                          |                                                           |                          |                          |                          |                                                                                     |                          |                          |                          |                                  |                          |                          |                          |                                        |                          |                          |                          |                                                                             |                          |                          |                          |
| b. Other candy                                                                      | <input type="checkbox"/>                                                                                                                                                                                                                                                                                                                                                                                                                                                                                                                                                                                                                                                                                                                                                                                                                                                                                                                                                                                                                                                                                                                                                                                                                                                                                                                                                                                                                                                                                                                                                                                                                                                                                                                                                                                             | <input type="checkbox"/> | <input type="checkbox"/> |    |     |                                                          |                          |                          |                          |                                                      |                          |                          |                          |                                                     |                          |                          |                          |                                                                 |                          |                          |                          |                                                           |                          |                          |                          |                                                                                     |                          |                          |                          |                                  |                          |                          |                          |                                        |                          |                          |                          |                                                                             |                          |                          |                          |
| c. Other junk food (e.g., popcorn)                                                  | <input type="checkbox"/>                                                                                                                                                                                                                                                                                                                                                                                                                                                                                                                                                                                                                                                                                                                                                                                                                                                                                                                                                                                                                                                                                                                                                                                                                                                                                                                                                                                                                                                                                                                                                                                                                                                                                                                                                                                             | <input type="checkbox"/> | <input type="checkbox"/> |    |     |                                                          |                          |                          |                          |                                                      |                          |                          |                          |                                                     |                          |                          |                          |                                                                 |                          |                          |                          |                                                           |                          |                          |                          |                                                                                     |                          |                          |                          |                                  |                          |                          |                          |                                        |                          |                          |                          |                                                                             |                          |                          |                          |
| d. Soda pop or fruit drinks that are not 100% juice                                 | <input type="checkbox"/>                                                                                                                                                                                                                                                                                                                                                                                                                                                                                                                                                                                                                                                                                                                                                                                                                                                                                                                                                                                                                                                                                                                                                                                                                                                                                                                                                                                                                                                                                                                                                                                                                                                                                                                                                                                             | <input type="checkbox"/> | <input type="checkbox"/> |    |     |                                                          |                          |                          |                          |                                                      |                          |                          |                          |                                                     |                          |                          |                          |                                                                 |                          |                          |                          |                                                           |                          |                          |                          |                                                                                     |                          |                          |                          |                                  |                          |                          |                          |                                        |                          |                          |                          |                                                                             |                          |                          |                          |
| e. Sports drinks                                                                    | <input type="checkbox"/>                                                                                                                                                                                                                                                                                                                                                                                                                                                                                                                                                                                                                                                                                                                                                                                                                                                                                                                                                                                                                                                                                                                                                                                                                                                                                                                                                                                                                                                                                                                                                                                                                                                                                                                                                                                             | <input type="checkbox"/> | <input type="checkbox"/> |    |     |                                                          |                          |                          |                          |                                                      |                          |                          |                          |                                                     |                          |                          |                          |                                                                 |                          |                          |                          |                                                           |                          |                          |                          |                                                                                     |                          |                          |                          |                                  |                          |                          |                          |                                        |                          |                          |                          |                                                                             |                          |                          |                          |
| f. Cookies, crackers, cakes, pastries, or other baked goods that are not low in fat | <input type="checkbox"/>                                                                                                                                                                                                                                                                                                                                                                                                                                                                                                                                                                                                                                                                                                                                                                                                                                                                                                                                                                                                                                                                                                                                                                                                                                                                                                                                                                                                                                                                                                                                                                                                                                                                                                                                                                                             | <input type="checkbox"/> | <input type="checkbox"/> |    |     |                                                          |                          |                          |                          |                                                      |                          |                          |                          |                                                     |                          |                          |                          |                                                                 |                          |                          |                          |                                                           |                          |                          |                          |                                                                                     |                          |                          |                          |                                  |                          |                          |                          |                                        |                          |                          |                          |                                                                             |                          |                          |                          |
| g. Fruits or vegetables                                                             | <input type="checkbox"/>                                                                                                                                                                                                                                                                                                                                                                                                                                                                                                                                                                                                                                                                                                                                                                                                                                                                                                                                                                                                                                                                                                                                                                                                                                                                                                                                                                                                                                                                                                                                                                                                                                                                                                                                                                                             | <input type="checkbox"/> | <input type="checkbox"/> |    |     |                                                          |                          |                          |                          |                                                      |                          |                          |                          |                                                     |                          |                          |                          |                                                                 |                          |                          |                          |                                                           |                          |                          |                          |                                                                                     |                          |                          |                          |                                  |                          |                          |                          |                                        |                          |                          |                          |                                                                             |                          |                          |                          |
| h. 100% fruit juice or vegetable juice                                              | <input type="checkbox"/>                                                                                                                                                                                                                                                                                                                                                                                                                                                                                                                                                                                                                                                                                                                                                                                                                                                                                                                                                                                                                                                                                                                                                                                                                                                                                                                                                                                                                                                                                                                                                                                                                                                                                                                                                                                             | <input type="checkbox"/> | <input type="checkbox"/> |    |     |                                                          |                          |                          |                          |                                                      |                          |                          |                          |                                                     |                          |                          |                          |                                                                 |                          |                          |                          |                                                           |                          |                          |                          |                                                                                     |                          |                          |                          |                                  |                          |                          |                          |                                        |                          |                          |                          |                                                                             |                          |                          |                          |
| i. Low-fat cookies, crackers, cakes, pastries, or other low-fat baked goods         | <input type="checkbox"/>                                                                                                                                                                                                                                                                                                                                                                                                                                                                                                                                                                                                                                                                                                                                                                                                                                                                                                                                                                                                                                                                                                                                                                                                                                                                                                                                                                                                                                                                                                                                                                                                                                                                                                                                                                                             | <input type="checkbox"/> | <input type="checkbox"/> |    |     |                                                          |                          |                          |                          |                                                      |                          |                          |                          |                                                     |                          |                          |                          |                                                                 |                          |                          |                          |                                                           |                          |                          |                          |                                                                                     |                          |                          |                          |                                  |                          |                          |                          |                                        |                          |                          |                          |                                                                             |                          |                          |                          |
| Adapted                                                                             | <i>(removed)</i>                                                                                                                                                                                                                                                                                                                                                                                                                                                                                                                                                                                                                                                                                                                                                                                                                                                                                                                                                                                                                                                                                                                                                                                                                                                                                                                                                                                                                                                                                                                                                                                                                                                                                                                                                                                                     |                          |                          |    |     |                                                          |                          |                          |                          |                                                      |                          |                          |                          |                                                     |                          |                          |                          |                                                                 |                          |                          |                          |                                                           |                          |                          |                          |                                                                                     |                          |                          |                          |                                  |                          |                          |                          |                                        |                          |                          |                          |                                                                             |                          |                          |                          |

|          |                                                                                                                                                                                                                                                                                                                                                      |                          |                          |                          |                          |                          |
|----------|------------------------------------------------------------------------------------------------------------------------------------------------------------------------------------------------------------------------------------------------------------------------------------------------------------------------------------------------------|--------------------------|--------------------------|--------------------------|--------------------------|--------------------------|
| Original | 27. How much of a problem are the following in the neighborhood where this school is located?                                                                                                                                                                                                                                                        |                          |                          |                          |                          |                          |
|          |                                                                                                                                                                                                                                                                                                                                                      | Major problem            | Moderate problem         | Minor problem            | Not a problem            | I don't know             |
|          | a. Tensions based on racial, ethnic, or religious differences                                                                                                                                                                                                                                                                                        | <input type="checkbox"/> |
|          | b. Garbage, litter, or broken glass in the street or road, on the sidewalks, or in yards                                                                                                                                                                                                                                                             | <input type="checkbox"/> |
|          | c. Selling or using drugs or excessive drinking in public                                                                                                                                                                                                                                                                                            | <input type="checkbox"/> |
|          | d. Gangs                                                                                                                                                                                                                                                                                                                                             | <input type="checkbox"/> |
|          | e. Heavy traffic                                                                                                                                                                                                                                                                                                                                     | <input type="checkbox"/> |
|          | f. Vacant or shabby houses and buildings                                                                                                                                                                                                                                                                                                             | <input type="checkbox"/> |
|          | g. Crime in the neighborhood                                                                                                                                                                                                                                                                                                                         | <input type="checkbox"/> |
| Forward  | 27. Cât de mult apreciați a fi o problemă următoarele aspecte legate de zona în care este situată școala?                                                                                                                                                                                                                                            |                          |                          |                          |                          |                          |
|          | Tensiuni bazate pe diferențe etnice, religioase sau regionale / Gunoaie aruncate în împrejurimile școlii / Comercializarea de băuturi alcoolice în împrejurimile școlii / Uzul sau tranzacția de droguri în împrejurimile școlii / Bande/găști de cartier / Trafic rutier intens / Clădiri abandonate sau avariate / Rata criminalității din cartier |                          |                          |                          |                          |                          |
|          | Problemă majoră / Problemă moderată / Problemă minoră / Nu e o problemă                                                                                                                                                                                                                                                                              |                          |                          |                          |                          |                          |
| Backward | 27. How much of a problem are the following issues in the area where the school is located?                                                                                                                                                                                                                                                          |                          |                          |                          |                          |                          |
|          | Tensions based on ethnic, religious or regional differences / garbage dumped on the school surroundings / sale of alcoholic beverages in the vicinity of the school / use or dealing of drugs in the vicinity of the school / gangs/neighborhood gangs / heavy road traffic / abandoned or damaged buildings / crime rate in the neighborhood        |                          |                          |                          |                          |                          |
|          | Major problem / moderate problem / minor problem / not a problem                                                                                                                                                                                                                                                                                     |                          |                          |                          |                          |                          |
